1 **A novel cross talk of AtRAV1, an ethylene responsive transcription factor with MAP**  
2 **kinases imparts broad spectrum disease resistance in plants**

3

4 # Ravindra Kumar Chandan<sup>1,2</sup> (rjha.bhu@gmail.com)

5 # Rahul Kumar<sup>1</sup> (rahuls697@gmail.com)

6 # Durga Madhab Swain<sup>1</sup> (dsnanowizard@gmail.com)

7 Srayan Ghosh<sup>1</sup> (srayan@nipgr.ac.in)

8 Prakash Kumar Bhagat<sup>3</sup> (prakash@nipgr.ac.in)

9 Sunita Patel<sup>2</sup> (sunitapcug@gmail.com)

10 Ganesh Bagler<sup>4</sup> (bagler@iiitd.ac)

11 Alok Krishna Sinha<sup>3</sup> (alok@nipgr.ac.in)

12 Gopaljee Jha<sup>1,\*</sup> (jmsgopal@nipgr.ac.in; jmsgopal@gmail.com)

13

14 \* Corresponding Author:

15 Email: jmsgopal@nipgr.ac.in; jmsgopal@gmail.com

16 Tel: +91(0)1126735177

17 Fax: +91(0)1126741658

18 # These authors contribute equally to this work

19

20 1: Plant microbe interactions lab, National Institute of Plant Genome Research, Aruna Asaf  
21 Ali Marg, New Delhi-110067, India.

22 2: School of Life Sciences, Central University of Gujarat, Sector-30, Gandhinagar-382030,  
23 India.

24 3: National Institute of Plant Genome Research, Aruna Asaf Ali Marg, New Delhi-110067,  
25 India.

26 4: Centre for Computational Biology, Indraprastha Institute of Information Technology  
27 (IIIT-Delhi), New Delhi-110020, India.

28 **Short title:** RAV1 promotes disease resistance in plants

29

30

31

32

33

34 **Abstract**

35 **Plant diseases pose a serious threat to sustainable agriculture as controlling them in**  
36 **eco-friendly manner remains a challenge. In this study, we establish RAV1 as a master**  
37 **transcriptional regulator of defense genes in model plant Arabidopsis. The**  
38 **overexpression of *AtRAV1* provided disease resistance against necrotrophic fungal**  
39 **pathogen (*Rhizoctonia solani*) infection in *A. thaliana*. The transgenic lines exhibited**  
40 **enhanced expression of several defense genes including mitogen associated protein**  
41 **kinases (MAPKs) and the amplitude of their expression was further enhanced upon**  
42 **pathogen infection. Conversely, the *atrav1* mutant plants were unable to induce the**  
43 **expression of these defense genes and were highly susceptible to infection. Our data**  
44 **suggests that upon pathogen attack, *AtRAV1* transcriptionally upregulate the**  
45 **expression of *MAPKs* (*AtMPK3*, *AtMPK4* and *AtMPK6*) and *AtMPK3* and *AtMPK6* are**  
46 **essential for *AtRAV1* mediated disease resistance. Further, we demonstrate that**  
47 ***AtRAV1* is a phosphorylation target of *AtMPK3* (but not *AtMPK6*) and the phospho-**  
48 **defective variants of *AtRAV1* are unable to induce disease resistance in *A. thaliana*.**  
49 **Considering the presence of *AtRAV1* orthologs in diverse plant species, we propose**  
50 **that they can be gainfully deployed to control economically important diseases. In deed**  
51 **we observe that overexpression of tomato ortholog of *AtRAV1* (*SIRAV1*) provides**  
52 **broad spectrum disease resistance against bacterial (*Ralstonia solanacearum*), fungal**  
53 **(*R. solani*) and viral (Tomato leaf curl virus) infections in tomato.**

54 **Key words:** Bacterial wilt disease, disease resistance, MAP kinase, plant defense response,  
55 post translational modification, protein phosphorylation, signalling cascades, transcription  
56 factor, transcriptional regulator, reactive oxygen species

57

58 Plants have evolved specific receptors to perceive pathogen attack. The PRRs (Pattern  
59 recognition receptors) is deployed to perceive pathogen associated molecular cues while  
60 leucine rich repeat (LRR) receptors recognize effector proteins of the pathogens (1–3). In  
61 this process, plant mount strong defense response to ward off most of the pathogens (1, 4–  
62 6). Increase in production of reactive oxygen species (oxidative burst), alkalization of  
63 cytoplasm, production of phenolics, phytoalexins, deposition of lignin and callose,  
64 hypersensitive response associated programmed cell death, etc are part of plant defense  
65 strategies (7). The phytohormones such as jasmonic acid, salicylic acid and ethylene also

66 play a critical role in elaborating the plant defense response (8–12). Moreover, an extensive  
67 crosstalk (both synergistic and antagonistic) between various phytohormones modulate the  
68 defense response (13, 14).

69 On the other hand, for successful colonization phytopathogens have evolved diverse  
70 strategies to suppress the induction of plant defense response. With extensive  
71 polymorphisms in various isolates/strains, some phytopathogens are able to cause disease on  
72 diverse host species. *Ralstonia solanacearum* is one of the notable examples which causes  
73 devastating bacterial wilt disease in tomato, potato and over two hundred other plant species  
74 (15–17). Similarly *Rhizoctonia solani* a necrotrophic fungal pathogen infects diverse plants  
75 including rice, potato, tomato etc. and imparts huge economic losses (18, 19). Notably *R.*  
76 *solanacearum* and *R. solanacearum* share many common hosts, including agriculturally important  
77 crops such as tomato, potato, etc. Moreover viruses also pose a serious threat for crop  
78 production (20). Thus, strategy to simultaneously control bacterial, fungal as well as viral  
79 diseases in an eco-friendly and sustainable fashion will be important for ensuring food  
80 security.

81 Manipulation of some of the PRR receptors, LRR receptors and host defense related genes  
82 had been shown to provide broad spectrum disease resistance in plants (21, 22) The  
83 overexpression of *AtNPR1* (Non expressor of *PR* genes; encoding a positive regulator of  
84 SAR) provided broad spectrum disease resistance in various crop plants (23, 24). Similarly,  
85 the overexpression of an *AtEFR* (a PRR receptor) gene could enhance tolerance against  
86 bacterial pathogen (*R. solanacearum*, *Xanthomonas perforans*) infection in tomato (25).  
87 Further, overexpression of an anti-apoptotic vacuoviral p35 protein also imparted broad  
88 spectrum disease resistance in tomato against bacterial (*Pseudomonas syringae* pv. tomato)  
89 and fungal (*Alternaria alternata* and *Colletotrichum coccodes*) infections (26). However,  
90 the deployment of transgenes in disease management has to face strong biosafety  
91 regulations (27). In this regard, utilization of endogenous gene(s) with broad spectrum  
92 disease resistance will be helpful in preventing yield loss due to pathogen attack.

93 In this study, we endeavoured to identify master regulator of plant defense genes in model  
94 plant *A. thaliana* and explore the potential of identified gene to impart broad spectrum  
95 disease resistance in economically important crops such as tomato. Based upon network  
96 centrality parameters, we identified 16 proteins to be topologically central to Arabidopsis  
97 defense proteins interaction network. The RAV1 transcription factor binding motifs was  
98 present in the promoter region of each of the genes encoding them. It is worth mentioning

99 that RAV1 is an ethylene responsive transcription factor which contains AP2 domain (which  
100 participates in activation of ethylene mediated signalling pathway) at its N-terminal region  
101 and B3 domain (involved in abscisic acid mediated signalling) at its C-terminus (28, 29).  
102 RAV1 has been shown to be a positive regulator of leaf senescence (30) and upon  
103 overexpression it provides ABA insensitive phenotype in *A. thaliana* (29).  
104 In this study we identified AtRAV1 as a master regulator of defense gene expression in *A.*  
105 *thaliana* including mitogen activated protein kinases (MAPKs; AtMPK3, AtMPK4 and  
106 AtMPK6) and when overexpressed it provides disease resistance against *R. solani*.  
107 Similarly, overexpression of *SIRAV1* (ortholog of *AtRAV1*) confers broad spectrum disease  
108 resistance in tomato against fungal (*R. solani*), bacterial (*R. solanacearum*) and viral  
109 (tomato leaf curl Joydebpur virus; *ToLCJoV*) infections. The data presented in this study  
110 highlights a novel cross talk between RAV1 with MAPKs in imparting disease resistance.  
111 The RAV1 transcriptionally induces the expression of *MAPKs* (*AtMPK3*, *AtMPK4* and  
112 *AtMPK6*) and the AtMPK3/AtMPK6 is essential for RAV1 mediated disease resistance.  
113 Further the AtMPK3 (but not AtMPK6) phosphorylates AtRAV1 and potentially stabilize it  
114 to facilitate sustained activation of defense response.

## 115 **Results**

116 **Identification of *AtRAV1* as a key transcriptional regulator of plant defense genes.** *In-*  
117 *silico* analysis of protein-protein interactions between Arabidopsis defense proteins (31);  
118 identified 16 proteins to be important for the topology and dynamics of the network (**Fig.**  
119 **S1**). Here onwards, we refer these proteins as key defense proteins of Arabidopsis. Some of  
120 the previously reported plant defense proteins such as SKP1 (32), MAPKs (33, 34), heat  
121 shock proteins (35, 36) and cyclophilins (37, 38) were noteworthy in this list. Interestingly,  
122 the RAV1 binding sites were present in the promoter region of each of these genes (**Fig.**  
123 **S2**). The phylogenetic analysis revealed RAV1 to be conserved in different monocot as well  
124 as dicot plants (**Fig. S3**). Presence of RAV1 binding motifs in the *AtRAV1* promoter (**Fig.**  
125 **S4**) suggested it to be under auto-regulation.

126 **Overexpression of *AtRAV1* induces the expression of key defence genes.** We reasoned  
127 that overexpression of *AtRAV1* would simultaneously induce the key defense genes and  
128 promote disease resistance in *A. thaliana*. To test this, transgenic *A. thaliana* (Col-0) lines  
129 that constitutively overexpress *AtRAV1* (At1G13260) under CaMV 35S promoter were  
130 generated. Two independent overexpression lines (OE1 and OE2) having relatively higher



131 fold expression of *AtRAV1* along with an EV line were propagated to T<sub>4</sub> generation for  
132 further analysis (**Fig. S5**). Compared to EV plants, the OE lines (OE1 and OE2)  
133 demonstrated enhanced expression of key defense genes (**Fig. 1A**).

134 To validate that *AtRAV1* can bind to the promoter and induces expression, we randomly  
135 selected few of key defense genes namely *MPK4*, *MPK6*, *ROCI*, *WD40*, *BRL2*, *SKP1* and  
136 *HSP70* and performed yeast one hybrid (Y1H) as well as GUS reporter assays. For Y1H  
137 assay potential *AtRAV1* binding motifs in the promoter region of these genes (**Table S1**)  
138 were individually cloned in a bait vector (pAbAi) while the full length *AtRAV1* was cloned  
139 in a prey vector (pGADT7-AD). The Y1H Gold bait reporter yeast strain expressing both  
140 the plasmids grew on Aureobasidin A (AbA) containing double drop out (SD-URA-LEU)  
141 plates while the strain co-expressing empty vectors (pAbAi and pGADT17) failed to grow  
142 on such plates (**Fig. 1B**). GUS reporter assay was performed in *N. benthamiana* plants to  
143 validate that co-expression of *AtRAV1* modulates GUS expression through the promoters of  
144 selected key defense genes. Limited GUS expression was observed in  
145 pBI101:promoter:*GUS* infiltrated leaves, while significantly enhanced GUS expression was  
146 observed when promoter:*GUS* and *AtRAV1* constructs were co-infiltrated (**Fig. 1C**). The  
147 qRT-PCR further reinforced that expression of *AtRAV1* enhances *GUS* expression (**Fig. 1D**).  
148 Taken together, our result suggests that *AtRAV1* modulates the expression of various key  
149 defense genes including *AtMPK4* and *AtMPK6*. As *AtMPK3* is an important player in plant  
150 defense (39), we performed Y1H and promoter:*GUS* reporter assays to test whether  
151 *AtRAV1* can modulate *AtMPK3* gene expression. As shown in **Fig. S6**, the *AtRAV1* did  
152 bind to the promoter of *AtMPK3* and induced its expression.

153 **Overexpression of *AtRAV1* confers disease resistance in *A. thaliana*.** We further analysed  
154 whether the overexpression of *AtRAV1* enhances disease resistance against *Rhizoctonia*  
155 *solani*, a notorious necrotrophic fungal pathogen infection. Both OE1 and OE2 lines  
156 demonstrated only mild necrotic symptoms when infected with *R. solani*, however severe  
157 necrosis was observed in the infected *atrav1* mutant (a previously reported mutant line  
158 *Salk\_021865*; obtained from Arabidopsis Biological Resource Center, ABRC; **Fig. S7**), EV  
159 as well as WT plants (**Fig. 2A**). Compared to others the extent of host cell death (**Fig. 2B**)  
160 and ROS accumulation was relatively less in the infected OE lines (**Fig. 2C**). Moreover, the  
161 disease severity index (**Fig. 2D**) and abundance of fungal (estimated through monitoring the  
162 abundance of *R. solani* 18S ribosomal gene through qRT-PCR) biomass (**Fig. 2E**) was  
163 significantly less in infected OEs plants, compared to the infected *atrav1* mutant, WT and

164 EV plants. Also the chlorophyll content was relatively higher in infected OE lines compared  
165 to that of WT, EV and *atrav1* mutant plants (**Fig. 2F**). The confocal microscopic analysis  
166 revealed limited growth of *R. solani* and absence of infection cushion in OE lines (**Fig. 2G**).  
167 Taken together, these results reinforced that overexpression of *AtRAV1* imparts enhanced  
168 resistance against *R. solani* infection.

169 **Expression of key defense genes gets enhanced upon pathogen infection in *AtRAV1***  
170 **overexpressing lines.** In comparison to WT and EV plants, the expression of *AtRAV1* was  
171 up-regulated upon pathogen (*R. solani*) infection in OE lines but not in the *atrav1* mutant  
172 lines (**Fig. S8**). Similarly, the expression of most of the selected key defense genes (*BRL2*,  
173 *ROCI*, *SKP1*, *WD40* and *HSP70*) as well as previously reported Salicylic acid (SA),  
174 Jasmonic acid (JA) and Ethylene (ET) mediated defense marker genes (**Table S2**) were  
175 significantly enhanced upon *R. solani* infection in the OE lines but not in the *atrav1* mutant  
176 plants (**Fig. S9A and B**). Also the enhanced expression of *AtMPK3*, *AtMPK4* and *AtMPK6*  
177 was observed in *R. solani* infected OE lines (**Fig. 3A**). Western blot analysis further  
178 revealed enhanced accumulation of *AtMPK3*, *AtMPK4* and *AtMPK6* proteins in the  
179 infected OE lines but not in the *atrav1* mutant plants (**Fig. 3B**). Here it is worth mentioning  
180 that compared to *AtMPK4*, the extent of up-regulation of *AtMPK3* and *AtMPK6* was  
181 significantly high (**Fig. 3**).

182 ***AtMPK3* and *AtMPK6* are required for *AtRAV1* mediated disease resistance in *A.***  
183 ***thaliana*.** We obtained *AtMPK3* (*atmpk3*, SALK\_100651), *AtMPK4* (*atmpk4-2*,  
184 SALK\_056245) and *AtMPK6* (*atmpk6-2*, SALK\_073907) mutants from ABRC stock centre  
185 and subjected them to *R. solani* infection. The *mpk3* and *mpk6-2* mutants were hyper  
186 susceptible to *R. solani* infection while the *mpk4-2* mutant was moderately susceptible (**Fig.**  
187 **4A**). We crossed each of MAP kinase mutants individually with the *AtRAV1* OE1 plants to  
188 obtain the *AtRAV1*<sup>OE1</sup>/*mpk3*, *AtRAV1*<sup>OE1</sup>/*mpk4-2* and *AtRAV1*<sup>OE1</sup>/*mpk6-2* lines; wherein  
189 the respective MAP kinase protein has been knocked out (**Fig. S10**). Interestingly, the  
190 *AtRAV1*<sup>OE1</sup>/*mpk3* as well as *AtRAV1*<sup>OE1</sup>/*mpk6-2* lines demonstrated hyper susceptibility  
191 to *R. solani* infection (**Fig. 4A**). On the other hand the *AtRAV1*<sup>OE1</sup>/*mpk4-2* showed  
192 moderate disease tolerance; however the amplitude of tolerance was significantly less  
193 compared to that observed in OE1 lines (**Fig. 4A-C**). Also ROS accumulation, extent of host  
194 cell death and pathogen load (*R. solani* biomass estimated through qRT-PCR) were  
195 significantly high in *AtRAV1*<sup>OE1</sup>/*mpk3* and *AtRAV1*<sup>OE1</sup>/*mpk6-2* lines, compared to the  
196 *AtRAV1*<sup>OE1</sup>/*mpk4-2* or OE1 lines (**Fig. 4A and 4B**). The total chlorophyll content of

197 infected AtRAV1<sup>OE1</sup>/mpk3 and AtRAV1<sup>OE1</sup>/mpk6-2 lines was significantly less compared  
198 to that of AtRAV1<sup>OE1</sup>/mpk4-2 or OE1 line (**Fig. 4C**). Taken together these results  
199 highlighted that AtMPK3/AtMPK6 is predominantly required for AtRAV1 mediated  
200 enhanced disease resistance in *A. thaliana*.

201 **AtRAV1 is phosphorylated by AtMPK3 under in-vitro condition.** Bioinformatics  
202 analysis revealed that AtRAV1 protein contains three TP and one SP amino acid residues as  
203 putative MAP kinase phosphorylation sites (**Fig. S11**). We ectopically overexpressed and  
204 purified AtRAV1 protein as well as its different variants wherein potential phosphorylation  
205 residues had been mutated (SDM1: Ser310Ala; SDM2: Thr19Ala; SDM3: Thr23Ala;  
206 SDM4: Thr193Ala; SDM5: having all four potential phosphorylation sites mutated) from *E.*  
207 *coli* cells to analyse their phosphorylation by AtMPK3 and AtMPK6 under in-vitro  
208 condition. The assay revealed that AtMPK3 but not AtMPK6 phosphorylate the AtRAV1  
209 (**Fig. 5A and 5B**). Compared to others, the SDM2 demonstrated weak phosphorylation  
210 signal by AtMPK3 whereas the phosphorylation was completely abolished in case of  
211 SDM5.

212 **Overexpression of phospho-defective variants of AtRAV1 is unable to induce disease**  
213 **resistance in *A. thaliana***

214 In order to test whether phosphorylation of AtRAV1 is required for inducing disease  
215 resistance, we overexpressed phospho-defective variants of AtRAV1 (SDM2 and SDM5) in  
216 the WT and *atrav1* mutant *A. thaliana* plants. Interestingly in both the cases (WT<sup>SDM2/SDM5</sup>  
217 and *atrav1*<sup>SDM2/SDM5</sup>) the plants were highly susceptible to *R. solani* infection (**Fig. 6A**). The  
218 severity of disease symptoms, extent of host cell death and pathogen load were also  
219 significantly higher in WT<sup>SDM2/SDM5</sup> and *atrav1*<sup>SDM2/SDM5</sup> plants, compared to the *AtRAV1*  
220 OE1 plants (**Fig. 6A and 6B**). In contrary to the OE1 line, the WT<sup>SDM2/SDM5</sup> and  
221 *atrav1*<sup>SDM2/SDM5</sup> lines were unable to induce the expression of key defense genes including  
222 MAP kinases (*AtMPK3*, *AtMPK4* and *AtMPK6*) (**Fig. 6C**) and defense marker genes (**Fig.**  
223 **6D**) upon pathogen infection. Overall, this suggested that phosphorylation of AtRAV1 is  
224 required for eliciting defense response and imparting disease resistance in *A. thaliana*.

225 **Overexpression of *SIRAV1* imparts broad spectrum disease resistance in tomato.** To  
226 further substantiate the role of RAV1 in plant defense, we analysed whether the *AtRAV1*  
227 ortholog of tomato (*SIRAV1*; EU164416) can impart disease resistance in tomato  
228 (*Lycopersicon esculentum* mill). Two independent *SIRAV1* OE (OE:L1 and OE:L2) lines  
229 were generated in tomato cultivar Pusa Ruby (**Fig. S12**). The qRT-PCR revealed both the

230 OE lines to have higher fold expression of *SIRAV1* (**Fig. S12E**) and the expression were  
231 significantly enhanced upon *R. solani* infection in OE lines (**Fig. S13A**). The western blot  
232 analysis also suggested enhanced accumulation of SIRAV1 in pathogen infected OE lines  
233 (**Fig. S13B**). The disease symptoms (**Fig. 7A**), disease severity index (**Fig. 7B**) and  
234 chlorophyll content of the infected leaves (**Fig. 7C**) suggested enhanced disease tolerance in  
235 OE lines, compared to EV and WT tomato plants. Also, the expression of most of the  
236 selected Salicylic acid (SA), Jasmonic acid (JA) and Ethylene (ET) mediated defense  
237 marker genes were significantly enhanced upon *R. solani* infection in the OE lines (**Fig.**  
238 **7D**).

239 We further tested the susceptibility of OE lines against a deadly pathogen (*Ralstonia*  
240 *solanacearum*) which causes bacterial wilt disease in tomato. As shown in **Fig. 8A**, the  
241 wilting symptoms was remarkably less in infected OE lines (OE:L1 and OE:L2), compared  
242 to WT plants. Notably, the pathogen (*R. solanacearum*) load and disease severity index  
243 were also significantly less in the infected OE:L1 and OE:L2 lines (**Fig. 8B** and **8C**). The  
244 enhanced accumulation of SIRAV1 protein in *R. solanacearum* (**Fig. 8D**) infected tomato  
245 OE lines, supported its pathogen inducible nature. Also gene expression (**Fig S14**) as well as  
246 enzymatic activity of some of the antioxidant markers such as catalase (CAT), ascorbate  
247 peroxidase (APX) and glutathione reductase (GR) were significantly higher in *R. solani*  
248 (**Fig. 7H-J**) and *R. solanacearum* (**Fig. 8H-J**) infected OE lines while the MDA content,  
249 H<sub>2</sub>O<sub>2</sub> content and ion leakage were reduced in these lines (**Fig. 7E-G** and **8E-G**).

250 We further observed the OE lines to have high level of tolerance against Tomato Leaf Curl  
251 Joydepur Virus (*ToLCJoV*) infection. The leaf curling symptom was negligible in the OE  
252 lines but severe in case of WT as well as EV plants (**Fig. S15A**). ROS accumulation (**Fig.**  
253 **S15B**), disease severity index (**Fig. S15C**) and total chlorophyll content (**Fig. S15D**) further  
254 reinforced enhanced tolerance against *ToLCJoV* infection in OE lines.

255

## 256 Discussion

257 Plants are susceptible to various bacterial, fungal and viral diseases. Controlling them in an  
258 eco-friendly manner is a challenge for sustainable agriculture. We endeavoured to identify  
259 gene(s) that can provide broad spectrum disease resistance in plants. Initially, while  
260 studying the defense protein interaction network, we identified RAV1, an ethylene  
261 responsive transcription factor as a master transcriptional regulator of defense genes in  
262 *Arabidopsis thaliana*. Previous studies had shown that overexpression of pepper RAV1

263 provides resistance against *Pseudomonas syringae* pv. tomato DC3000 (a hemi-biotrophic  
264 bacterial pathogen) infection in *A. thaliana* by induction of PR genes (40). Here we  
265 observed that overexpression of *AtRAV1* confers remarkable resistance against fungal  
266 (*Rhizoctonia solani*) infection in *A. thaliana*. Similarly, overexpression of *SIRAV1* (the  
267 *AtRAV1* ortholog in tomato) imparted remarkable level of protection against fungal (*R.*  
268 *solani*), bacterial (*R. solanacearum*) and viral (Tomato leaf curl virus) diseases in tomato.  
269 We observed that *AtRAV1* acts as a master transcriptional activator of various key defense  
270 genes (that are topologically central to defense protein interaction network) as well as JA,  
271 SA and ET responsive defense marker genes in *A. thaliana*. The enhanced expression of  
272 *AtMPK3*, *AtMPK4* and *AtMPK6* transcripts as well as their proteins in the pathogen infected  
273 OE lines suggests the activation of MAP kinase signalling. The *AtMPK3/AtMPK6*  
274 signalling seems essential for mediating *AtRAV1* mediated defense; as knocking out  
275 *AtMPK3* or *AtMPK6* (but not *AtMPK4*) rendered the *AtRAV1* OE lines hyper susceptible to  
276 *R. solani* infection. The MPK3/MPK6 mediated signalling plays an important role in  
277 elucidation of pathogen triggered immunity (PTI) and effector triggered immunity (ETI) as  
278 well as production of defense associated phytoalexin, camalexin in plants (41–44). Also the  
279 MPK3/MPK6 are known to phosphorylate some plant transcription factors and regulate  
280 important cellular response including defense response (45). Notably, the  
281 *AtMPK3/AtMPK6* mediated phosphorylation of some members of ERF family  
282 (ERF6/ERF104) assist in elucidation of plant defense response (46). In this study, we  
283 observed that *AtMPK3* but not *AtMPK6* can phosphorylate the *AtRAV1* under in-vitro  
284 condition. Recently, it has been reported that *AtMPK3* but not *AtMPK6* regulates  
285 submergence tolerance by phosphorylation of SUB1A1 (Submergence1A1) transcription  
286 factor (47). We anticipate that the *AtMPK3* mediated phosphorylation of *AtRAV1* may  
287 stabilize the protein during pathogen attack and activates it to stimulate the defense  
288 response. Thus on one hand, the *AtRAV1* binds to the promoter of different MAP kinases  
289 (*AtMPK3/AtMPK4/AtMPK6*) and induces their signalling while on the other hand *AtMPK3*  
290 phosphorylates *AtRAV1* and modulates its function. In deed we observed that phospho-  
291 defective variants of *AtRAV1* (SDM2 and SDM5) are unable to impart disease resistance  
292 against *R. solani* infection in *A. thaliana*.  
293 There has been trade-off between disease resistance and plant growth (48). The constitutive  
294 activation of defense genes can negatively impact plant growth and development (49).  
295 However in this study, we did not observe any apparent growth or developmental defects in

296 the RAV1 overexpressing *A. thaliana* as well as tomato lines. We attribute this may be due  
297 to observed dynamics of induction of defense genes expression in the OE lines. Although  
298 several defense genes including MAP kinases were overexpressed in OE lines, the extent of  
299 their up-regulation was further enhanced upon pathogen infections. Similarly, the  
300 antioxidant machinery of the host (tomato) was significantly enhanced upon pathogen (*R.*  
301 *solani* and *R. solanacearum*) infection in OE lines. Such dynamic expression of defense  
302 genes may ensure strong protection during pathogen attack while averting the negative  
303 effect of induced defense responses under control (uninfected) conditions. Further, due to a  
304 relatively short (<60 min) half-life (50) and potential ability to auto-regulate its own  
305 transcription, the level of RAV1 is limited under normal conditions. Conversely with  
306 pathogen inducible nature, the RAV1 level gets enhanced in the infected OE lines and upon  
307 potential phosphorylation by AtMPK3 the protein gets stabilized, leading to sustained  
308 activation of MPK3/MPK6 signalling and thereby induction of defense genes. In support of  
309 this, we observed limited induction of defense genes including MAPKs in the *A. thaliana*  
310 lines overexpressing the phosphor-defective variants of AtRAV1 (**Fig. 6**).

311 Overall, the present study reports RAV1, an ethylene responsive transcription factor as a  
312 master regulator of plant defense and is a novel phosphorylation target of AtMPK3. A cross  
313 talk between RAV1 and MAPKs is required for inducing disease resistance against *R. solani*  
314 infection in *A. thaliana*. Furthermore, the overexpression of tomato RAV1 provides  
315 remarkable level of protection against bacterial, fungal and viral infections in tomato.  
316 Considering that RAV1 orthologs are conserved in different monocot and dicot plants and  
317 we do not observed any trade-off between enhanced disease resistance with apparent  
318 growth/developmental defects in the overexpression *A. thaliana* and tomato lines, our study  
319 emphasizes that RAV1 can be gainfully deployed as a biotechnological intervention to  
320 develop broad spectrum disease resistance in a variety of crops.

321

## 322 **Methods**

323 **Identification of key defense proteins in *Arabidopsis thaliana*.** Mukhtar and colleagues  
324 have reported the list of plant (*A. thaliana*) and pathogen proteins (*Pseudomonas syringae*  
325 and *Hyaloperonospora arabidopsidis*) that are involved in plant pathogen interactions (51).  
326 The plant proteins (n=392 proteins) potentially involved in defense responses were  
327 obtained from that list (**Table S3**) and were mapped on to AtPIN (*A. thaliana* Protein  
328 Interaction Network) database (52) to construct a Arabidopsis Defense Protein Interaction



329 Network (ADPIN). Visualization of protein-protein interaction network was performed  
330 using Cytoscape (53). Furthermore the ADPINv1 (The Arabidopsis Defense Proteins  
331 Interaction Network vicinity 1) was constructed by extending ADPIN to include its first  
332 interacting partners.

333 Network centrality measures were computed for ADPINv1 proteins by graph-theoretical  
334 analysis. Degree (hubs), betweenness (bottlenecks) and average shortest path (swift  
335 communicators) were studied to identify proteins that are central to the interactome and  
336 might be critical for executing plant defense. Top 10 proteins with the best values for each  
337 of these network parameters, were selected. Notably few proteins were commonly  
338 predicted to have best values for each of the network parameter. After removing these  
339 redundant proteins from the list, 16 unique proteins, topologically and dynamically central  
340 to the network, were obtained (**Table S3**). These proteins are considered as key defense  
341 proteins. Gene Investigator tool (<https://geneinvestigator.com/>) revealed that genes encoding  
342 these proteins are induced during biotic stress (**Table S4**).

343 **Identification of *AtRAVI* as master transcriptional regulator of key defense genes.** The  
344 Arabidopsis Information Resources (TAIR) id of each of the 16 identified key defense gene  
345 was used as query in Plant PAN database (Plant PAN; <http://PlantPAN2.itps.ncku.edu.tw>).  
346 The transcription start site/5'UTR-End limit was fixed as 100bp, while transcription stop  
347 site/3'UTR-End was fixed as 1000bp. The analysis predicted putative transcription binding  
348 sites present in the 5'UTR (promoter) region in each of the genes. The *AtRAVI*  
349 (At1G13260) transcriptional factor binding sites were common in each of them.

350 **Plant Materials and Growth Conditions.** Different *A. thaliana* (Colombia-0; wild type,  
351 transgenic and Salk\_021865 mutant) lines used in this study were grown on soilrite at  
352 22°C with 8/16-h photoperiod, 70 % relative humidity in growth chamber. Similarly,  
353 different tomato (*S. lycopersicum*; cultivar Pusa ruby) plants and tobacco (*N. benthamiana*)  
354 plants were grown on soilrite at 26°C with 12/12-h photoperiod, 70 % relative humidity in  
355 growth chamber.

356 **Generation of *AtRAVI* overexpressing *A. thaliana* and *SIRAVI* overexpressing tomato.**  
357 The CDS of *AtRAVI* (AT1G13260) gene was cloned in pGJ100 (a modified pBin19 binary  
358 vector having MCS of pBSKS vector) and transformed into GV3101 strain of  
359 *Agrobacterium*. The *Agrobacterium* harbouring 35S:*RAVI* construct was inoculated into  
360 three weeks old *A. thaliana* (Col-0) plants by floral dip method (54). Presence of transgene  
361 was reconfirmed by PCR using *CaMV35S F* and *RAVIOX-R* primer. The *NptII-F* and



362 *NptII-R* primer pair was further used to confirm the presence of vector in both OE and EV  
363 lines. The expression of *AtRAV1* gene in different *A. thaliana* lines was verified by qRT  
364 PCR using primers mentioned in **Table S5**.

365 Similarly, the full length gene sequence of *SIRAV1* (EU164416) was cloned into gateway  
366 binary vector (pGWB408) using SIRAV1OX-F and SIRAV1OX-R primer pairs (**Table S5**)  
367 and transgenic tomato lines (OE:L1 and OE:L2) were generated through *Agrobacterium*  
368 (GV3101 strain) mediated transformation. The presence of transgene was confirmed by  
369 PCR using CaMV35S F and SIRAV1OX-R primer while T-DNA was verified by *NptII-F*  
370 and *NptII-R* primer. The expression of *SIRAV1* was validated by qRT-PCR using gene  
371 specific (SIRAV1 RTF and SIRAV1 RTR) primer. Total crude protein was isolated from  
372 100 mg of plant leaves using P-PER plant protein extraction kit (Thermo scientific: 89803)  
373 and the western blot was carried out by electro blotting the 20µg of total crude protein onto  
374 polyvinylidene fluoride (PVDF) membrane and probed with mouse polyclonal anti-His-  
375 antibody (1:30000 dilutions). The blot was developed as per manufacturer's protocol  
376 (Sigma-Aldrich, Japan).

377 **Generation of MAP kinase mutants in *AtRAV1* overexpressing OE1 lines.** The  
378 *AtMPK3* (*atmpk3*, SALK\_100651), *AtMPK4* (*atmpk4-2*, SALK\_056245) and *AtMPK6*  
379 (*atmpk6-2*, SALK\_073907) mutants were obtained from ABRC stock centre. Presence of  
380 T-DNA insertion in mutant (*atmpk3*, *atmpk4-2* and *atmpk6-2*) was individually conformed  
381 by PCR using T-DNA border primer and MAP kinase gene specific reverse primer  
382 (BP+RP) (**Table S5**). The cross between the MAP kinase mutant plants (as male plant) and  
383 the *AtRAV1* OE1 (as female) was set up and obtained seeds were grown on soilrite. Upon  
384 PCR validation of presence of *AtRAV1* overexpression construct (using  
385 CaMV35S\_forwerd and *AtRAV1* reverse primer) and T-DNA insertion in particular MAP  
386 kinase (using BP+RP primer), we propagated the seeds to T2 generation and used them for  
387 further studies.

388 **Yeast one hybrid assay.** Y1H assay was performed using Matchmaker Gold Yeast One-  
389 Hybrid Library Screening System (Clontech, USA). The nucleotide sequences of promoter  
390 region of selected key defense genes having potential RAV1 binding motifs were retrieved  
391 by using online tool (<https://bioinformatics.psb.ugent.be/plaza/>). The RAV1 motif enriched  
392 promoter sequence of each of the gene (**Table S1**) was cloned in pAbAi bait vector  
393 (Clontech, USA) in the upstream of Aureobasidine A. The plasmid was linearized with  
394 *BstBI* restriction enzyme and transformed into Y1H Gold yeast strain, as per

395 manufacturer's protocol and the positive transformants (Y1H-Bait) was selected on AbA  
396 (200mg ml<sup>-1</sup> AbA) plate. Subsequently the full-length copy of *AtRAV1* was cloned in  
397 pGADT7-AD (Clontech, USA) prey vector as GAL4 transcription activation domain  
398 (GAL4 AD) fusion protein. It was transformed in the Y1H-Bait strain and positive  
399 transformants (Y1H-Bait+Prey) were selected by growing serially diluted (10<sup>-1</sup>, 10<sup>-2</sup>, 10<sup>-3</sup>  
400 and 10<sup>-4</sup>) cells at 30°C for 3 days on AbA (200 mg/ml) containing double drop out (SD-  
401 URA-LEU) plates.

402 **GUS based reporter assay.** The promoter region of the selected key defense genes (as  
403 described above) was fused with *GUS* gene in pBI101 (pBI101:promoter:*GUS*) and  
404 *AtRAV1* full length gene (AT1G13260) was cloned under CaMV35S promoter in pGJ100  
405 (pGJ100:AtRAV1). The primer used for cloning is enlisted in **Table S5**. Both the  
406 recombinant plasmids were individually transformed into GV3101 strain of *Agrobacterium*  
407 and were co-infiltrated into the leaves of *N. benthamiana*. After 48 hours of infiltration,  
408 GUS expression was analyzed by staining the leaves with GUS solution (1 mg/ml) for 16  
409 hours at 37°C. Upon destaining in a solution (1:3 ratio of glacial acetic acid: ethanol) for 3  
410 to 4 hrs at room temperature and washing with distilled water (55).

411 **cDNA synthesis and expression analysis.** Total RNA was isolated from plant tissues  
412 using RNeasy Plant RNA isolation kit (Qiagen, Valencia, CA). 1µg of total RNA was used  
413 for cDNA synthesis using Verso cDNA synthesis kit (Thermo Fisher Scientific Inc, USA),  
414 as per the manufacturer's protocol. qRT-PCR of 16 key defence genes and various defense  
415 marker genes (SA, JA and ET) was performed using primers mentioned in **Table S5**. The  
416 relative fold change was calculated by using 2<sup>-ΔΔCt</sup> method (56).

417 **Pathogen infection assays.** *R. solani* AG1-IA (BRS1) strain (18) was used to infect *A.*  
418 *thaliana* and tomato. The *R. solani* sclerotia pre-germinated in potato dextrose broth (PDB,  
419 Himedia, Mumbai, India) at 28°C for 6 hours were used to infect the leaves of *A. thaliana*  
420 plants. A minimum of three leaves per plant and minimum 10 plants of each line per  
421 experiment was infected. However for tomato infection, the detached leaves (n=3) of at  
422 least 10 plants were used in each experiments (57). On the basis of observed symptom  
423 patterns (severe or mild or no symptoms), we categorised percentage of leaves having  
424 particular disease symptom as disease index. Total chlorophyll was calculated per square  
425 cm area according to Arnon's equation as mentioned earlier (58). Further, the *R. solani*  
426 biomass in the infected samples was estimated by monitoring the expression of its 18S  
427 rRNA gene through qRT-PCR using primers mentioned in **Table S5**.

428 The deadly bacterial pathogen *Ralstonia solanacearum* strain F1C1 was also used to infect  
429 tomato. The pathogen was grown in BG media (Peptone 10g, yeast extract 1g, casamino  
430 acid 1g, agar 1.5g per litre) at 28°C for 48 h and  $2 \times 10^8$  cfu/ml bacterial cells were drench  
431 inoculated in the 3 weeks grown nursery pots of tomato as per method described in (16). A  
432 minimum of 25 plants of each lines were infected in each experiment and the experiment  
433 was independently repeated twice. Disease symptoms were monitored at 7 dpi and  
434 percentage of plants with wilting symptoms was plotted as bar chart. The abundance of *R.*  
435 *solanacearum* was estimated by serial dilution plating method and counting the CFU per  
436 gram fresh weight of leaf as described earlier (59).

437 Also, the Tomato leaf curl Joydebpur virus (*ToLCJoV*) was infected to the 3 weeks old  
438 tomato leaves as described (60). The disease symptoms were observed at 21 dpi and the  
439 disease index, DAB staining and total chlorophyll content were estimated.

440 **Microscopic analysis.** The infected leaves were harvested and stained with WGA-FITC as  
441 described earlier to monitor the growth of *R. solani* mycelia (61). The samples were  
442 observed under GFP filter of Confocal Laser Scanning Microscope (AOBS TCS-SP5,  
443 Leica, Germany). The images were analysed using LAS AF Version: 2.6.0 build 7266  
444 software.

445 **Biochemical assays.** DAB staining was used for detection of ROS while trypan blue  
446 staining was performed to detect cell death assay in *R. solani* infected leaves of *A. thaliana*  
447 and tomato leaves (62).

448 Further, the MDA, H<sub>2</sub>O<sub>2</sub> content and ion leakage (%) were quantified using the earlier  
449 described method (61). Similarly the activities of various antioxidant enzymes (CAT, APX  
450 and GR) were estimated using the protocol described in (62).

451 **Expression and purification of AtRAV1 protein.** The *AtRAV1* gene was cloned in  
452 pET28a bacterial expression vector using *RAVIOX-F* and *RAVIOX-R* gene specific  
453 primers and transformed into *E. coli* (BL-21 strain, DE3-codon<sup>+</sup>) cells. The protein was  
454 purified using affinity chromatography (Ni<sup>+2</sup>-NTA) following the method described earlier  
455 (57). Similarly, the different variants of *AtRAV1*, having different phosphorylation residues  
456 mutated (SDM1: Ser310Ala; SDM2: Thr19Ala; SDM3: Thr23Ala; SDM4: Thr193Ala;  
457 SDM5: having all four potential phosphorylation sites mutated) were synthesized  
458 commercially (Gene Universal Inc; <http://www.geneuniversal.com/>) and cloned in pET28a  
459 to purify different variant proteins. The western blot was performed by electro blotting  
460 protein onto polyvinylidene fluoride (PVDF) membrane and probed with mouse polyclonal

461 anti-His-antibody (1:30000 dilutions). Also western blotting of AtMPK3, AtMPK4 and  
462 AtMPK6 was performed using anti-MAP kinase-antibody (1:20000 dilutions) as primary  
463 antibody and anti-mouse IgG (Sigma) protein (1:15000 dilutions) as secondary antibody.

464 ***In-vitro* phosphorylation of AtRAV1 by MAP Kinases.** The bacterially purified AtRAV1  
465 protein and its variants (as described above) were used for in-vitro phosphorylation assay.  
466 The CDS of *AtMPK3* and *AtMPK6* were cloned in pGEX4t2 vector in-frame with amino-  
467 terminal GST tag and transformed into *E. coli* (BL21). Upon 1mM IPTG induction for 4h,  
468 the proteins were purified using GST-beads as per manufacturer's protocols (63). The in-  
469 vitro kinase assay was performed as described in (47). Briefly, the MAP kinases and RAV1  
470 variant proteins (1:10) were incubated in a 20 $\mu$ l kinase reaction buffer (25 mM Tris-Cl (pH  
471 7.5), 10 mM MgCl<sub>2</sub>, 5 mM MnCl<sub>2</sub>, 1 mM DTT, 1 mM  $\beta$ -glycerol-phosphate, 1  $\mu$ M  
472 Na<sub>3</sub>VO<sub>4</sub>, 0.5 mg/ml MBP, 25  $\mu$ M ATP and 1  $\mu$ Ci [ $\gamma$ -<sup>32</sup>P] ATP) at 30°C for 30 minutes.  
473 The reaction was stopped by addition of 2x-SDS- loading buffer and heating at 95°C for 5  
474 minutes. The samples were fractionated in 10% to 12% SDS-PAGE. The phosphorylation  
475 signals were detected by Typhoon phosphor imaging system (GE Health Care, Life  
476 Sciences, USA).

477 **Overexpression of phospho-defective variants of *AtRAV1* in *A. thaliana*.**

478 The SDM2 and SDM5 variants of *AtRAV1* which were defective in *in-vitro*  
479 phosphorylation by AtMPK3 were PCR amplified and cloned in the pGJ100 plant  
480 transformation vector. The constructs were subsequently transformed into GV3101 strain  
481 of Agrobacterium and the recombinant bacterial strains were used for transformation in the  
482 WT (Col-0) and *atrav1* (*Salk\_021865*) mutant lines. The transgenic lines were confirmed  
483 through PCR and sequence analysis.

484 **Statistical analysis.** One-way analysis of variance was performed using Sigma Plot 12.0  
485 (SPSS, Inc. Chicago, IL, USA) with  $P \leq 0.05$  considered statistically significant. The  
486 statistical significance is mentioned in the figure legend, wherever required.

487 **Acknowledgements**

488 We acknowledge Ms Ekta Manglesh for making contributions during early stage of the  
489 envisaged research. RK acknowledges CSIR, SRA fellowship. Financial support from the  
490 DBT-RA programme in Biotechnology and Life Sciences is gratefully acknowledged by  
491 DMS. SG acknowledges SPM fellowship from CSIR. PKB thanks UGC for fellowship. The  
492 work has been supported by the research findings from Department of Biotechnology, Govt  
493 of India under NIPGR Flagship programme (imparting sheath blight disease tolerance in

494 rice) and NIPGR core research grant. We are grateful to Dr Ramesh Sonti, NIPGR for  
495 providing critical comments on the manuscript and helping us to improve its quality. Dr  
496 S.K. Ray from Tezpur University for his help in providing F1C1 wild type strain of  
497 *Ralstonia solanacearum*. We also thank Dr A.K. Singh, ICAR-IIVR, Varanasi for providing  
498 infectious clone of *ToLCJoV*.

#### 499 **Authors' contributions**

500 GJ conceived the work and coordinated its progress, GJ as well as GB planned while GB  
501 supervised the network analysis which leads to identification of key defense proteins. RKC  
502 carried out the detail characterization of *AtRAVI* as well as *SIRAVI* to establish its role in  
503 providing broad spectrum disease resistance against bacterial, fungal and viral infection. RK  
504 assisted in making various constructs and performed YIH. DMS performed protein  
505 purification, antioxidant assays and western blot analysis. SG assisted in confocal  
506 microscopic analysis and bioinformatics analysis. PKB performed the *in-vitro*  
507 phosphorylation assays, AKS contributed different MAPK mutants and antibodies, SP had  
508 provided valuable comments on the manuscript. GJ, RKC and DMS had written the  
509 manuscript and all authors have approved the final manuscript.

#### 510 **Competing interests**

511 The authors declare that they have no competing interests. Material distribution footnote:  
512 The author responsible for distribution of materials integral to the findings presented in this  
513 article in accordance with the policy described in the instructions for authors.

514

515

516

517

518

519

520

521 **Figure legends**

522

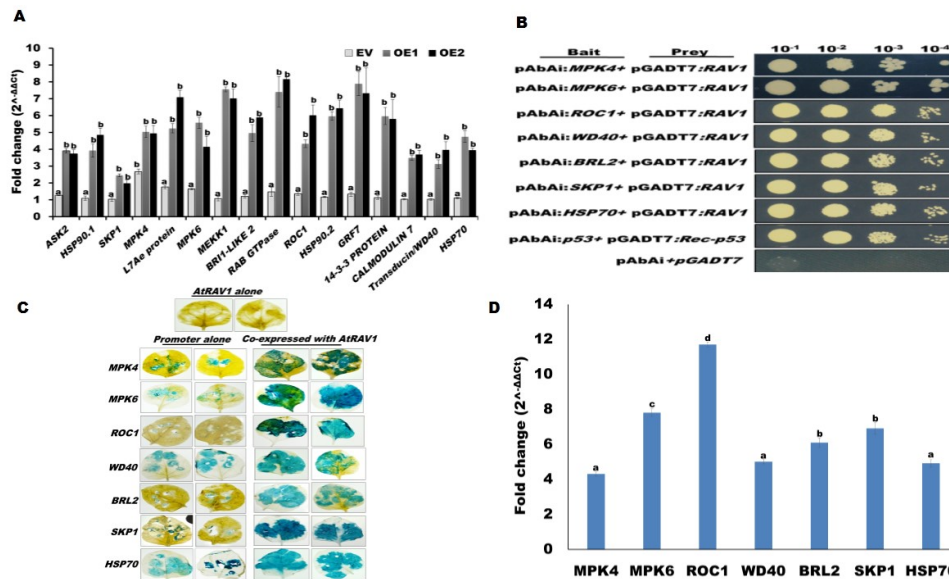

523

524 **Fig. 1.** *AtRAV1* up-regulates the expression of key defence genes. (A) Relative expression  
525 pattern of sixteen key defense genes in *A. thaliana*. The differential expression of these  
526 genes in *AtRAV1* overexpression lines (OE1 and OE2) with respect to the wild type (WT)  
527 plants was calculated using beta actin gene as endogenous control. (B) Yeast one hybrid  
528 (Y1H) based transactivation assay. The full-length *AtRAV1* were ligated into the pGADT7  
529 (Prey) vector and promoters of selected key defence genes were cloned in pAbAi bait  
530 vectors in upstream of Aureobasidine A (AbA). The growth of co-transformed (Prey+Bait)  
531 yeast strain on SD/-Leu/-Ura/AbA verifies the transactivation activity. (C) GUS reporter  
532 assay. Transcriptionally fused *GUS* under the promoter of selected key defense genes was  
533 found induced (appearance of blue color) when co-expressed with *AtRAV1* in *N.*  
534 *benthamiana*. (D) qRT-PCR quantification of *GUS* gene expression in *N. benthamiana*  
535 leaves. The *NptII* gene was used as internal control and relative expression was quantified  
536 upon normalization with promoter: *GUS* infiltrated samples. Graph shows mean values  $\pm$   
537 standard error of at least three technical replicates. For each gene, different letters indicate  
538 significant difference at  $P < 0.05$  (estimated using one-way ANOVA). Similar results were  
539 obtained in at least three biological repeats.

540

541



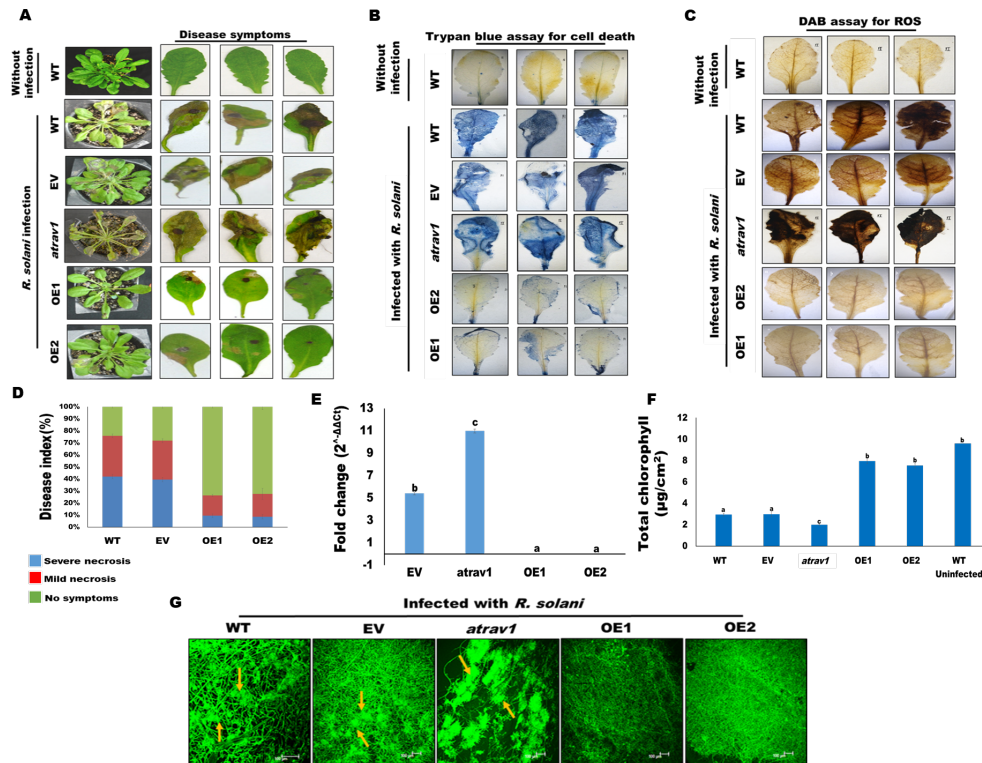

542

543 **Fig. 2.** Overexpression of *AtRAV1* provides disease resistance against *R. solani* infection in  
544 *A. thaliana*. (A) Disease symptoms observed as brown necrotic lesions in infected leaves at  
545 4 dpi. (B) Trypan blue staining for visualization of cell death and (C) DAB staining for ROS  
546 accumulation (brown coloration) in the infected leaves. (D) Disease index (based upon  
547 observed necrotic symptoms). (E) Bar graph showing qRT-PCR quantification of 18S RNA  
548 gene of *R. solani* (reflecting pathogen load). (F) Total chlorophyll content in *R. solani*  
549 infected *A. thaliana* leaves. (G) Confocal imaging of WGA-FITC stained *R. solani*  
550 mycelium in the infected leaves. The arrows indicate infection cushions in WT and EV  
551 plants. Graph shows mean values  $\pm$  standard error of at least three technical replicates.  
552 Values with different letters are significantly different at  $P < 0.05$  (estimated using one-way  
553 ANOVA). Similar results were obtained in at least three biological repeats.



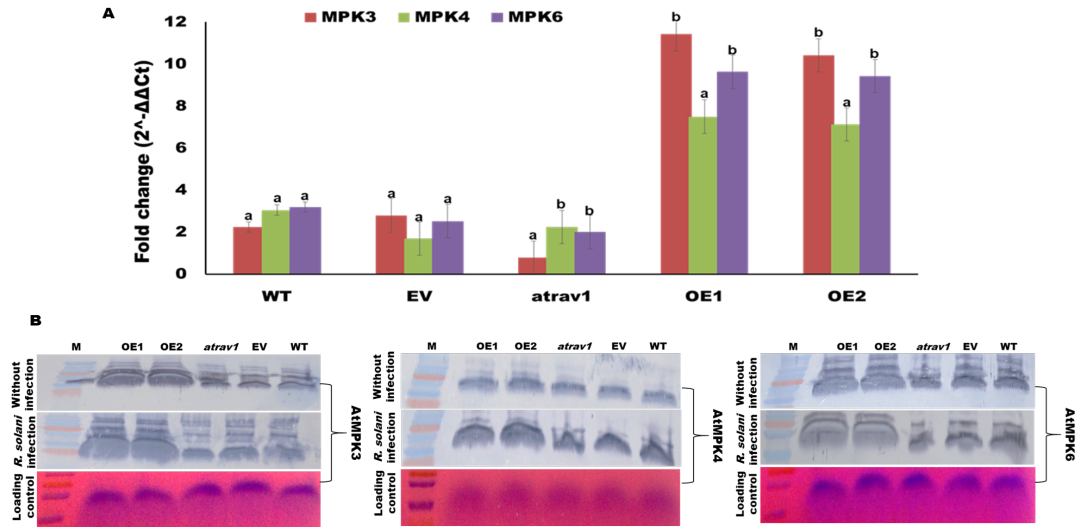

554

555 **Fig. 3.** The MAP kinases are induced in *R. solani* infected *AtRAV1* overexpressing lines. (A)  
556 Bar graph represents qRT-PCR based expression analysis of different *MAP* kinase genes in  
557 *R. solani* infected *A. thaliana* leaves. The relative expression was quantified by normalizing  
558 the expression with uninfected samples using beta actin as endogenous control. (B) Western  
559 blot analysis showing the expression of AtMPK3, AtMPK4 and AtMPK6 proteins in  
560 different *A. thaliana* plants with or without *R. solani* infection. Graph shows mean values  $\pm$   
561 standard error of at least three technical replicates. For each gene, different letters indicate  
562 significant difference at  $P < 0.05$  (estimated using one-way ANOVA). Similar results were  
563 obtained in at least three biological repeats.

564

565

566

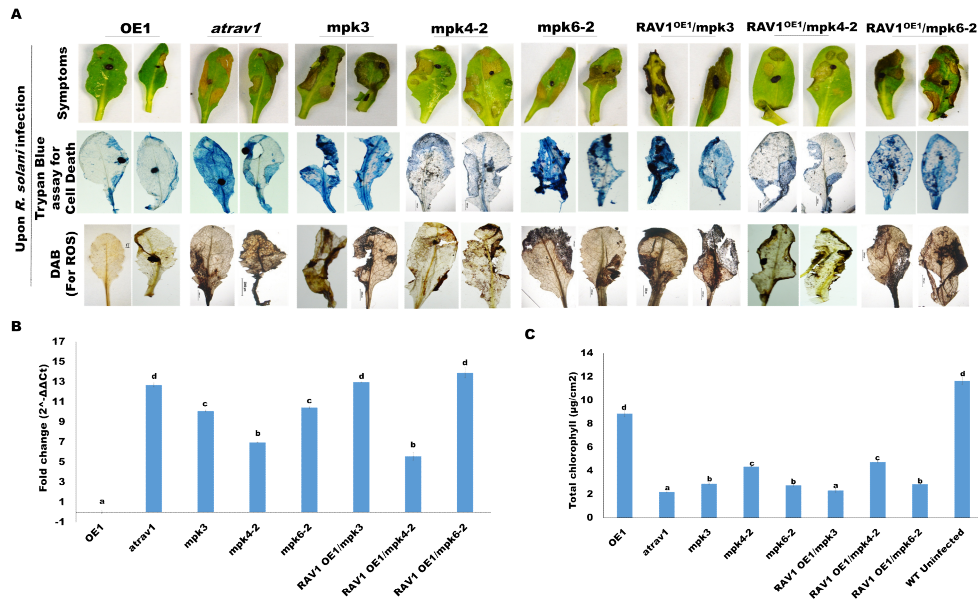

567

568 **Fig. 4.** AtRAV1 mediated disease resistance requires functional AtMPK3 and AtMPK6  
 569 proteins. (A) The disease symptoms, cell death (trypan blue staining) and ROS  
 570 accumulation (DAB staining) in the *R. solani* infected leaves of *A. thaliana* plants at 4 dpi.  
 571 (B) Bar graph showing qRT-PCR based quantification of 18S ribosomal RNA of *R. solani*  
 572 (reflecting pathogen load) in the infected plants. (C) Total chlorophyll content in the  
 573 infected *A. thaliana* leaves. Data are reflected as mean ± SE of at least three technical.  
 574 Values with different letters are significantly different at  $P < 0.05$  (estimated using one-way  
 575 ANOVA). Similar results were obtained in three biological repeats.

576

577

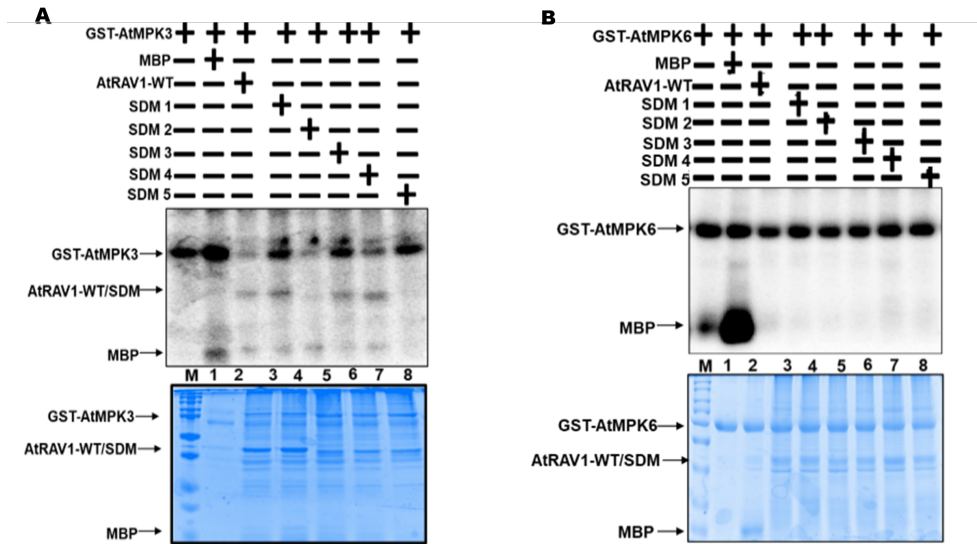

578

579 **Fig. 5.** AtRAV1 is phosphorylated by AtMPK3 under in-vitro condition. (A) and (B) Upper  
580 panel: Autoradiogram showing in-vitro phosphorylation of bacterially expressed AtRAV1  
581 with AtMPK3-GST and AtMPK6-GST. The phosphorylation of MBP was used as a positive  
582 control. (A) and (B) Lower panel: coomassie brilliant blue stained gel (12%) with positions  
583 of different proteins indicated by arrows. The plus and minus signs indicate the presence  
584 and absence of proteins, respectively during the assay.

585

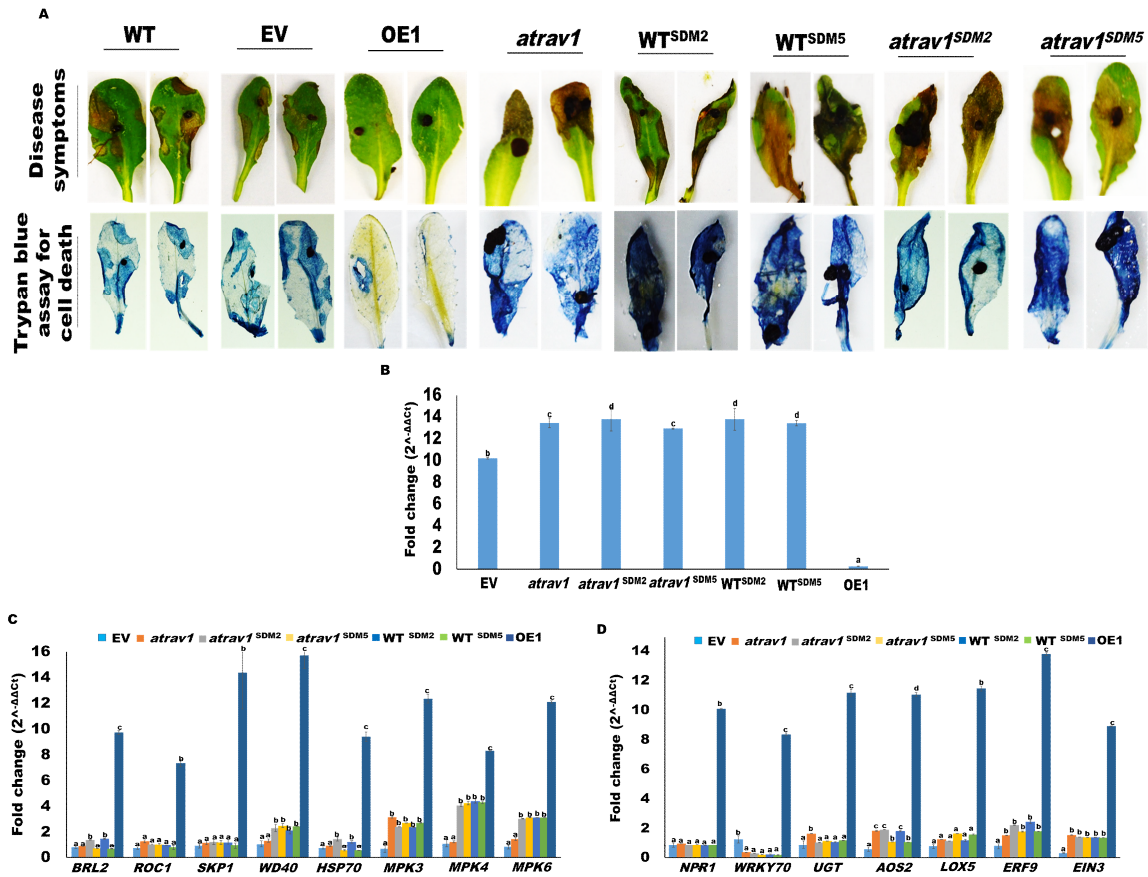

586

587 **Fig. 6.** The overexpression of phospho-defective variants of *AtRAV1* fail to impart  
 588 resistance against *R. solani* infections in *A. thaliana*. (A) The disease symptoms and  
 589 extent of host cell death (trypan blue staining) in the *R. solani* infected leaves of different  
 590 *A. thaliana* plants at 4 dpi. (B) Bar graph showing qRT-PCR based quantification of 18S  
 591 ribosomal RNA of *R. solani* (reflecting pathogen load) in the infected plants. The  
 592 expression of (C) selected key defense genes and (D) Defense marker genes in *R. solani*  
 593 infected lines. The relative expression was quantified by normalizing the expression with  
 594 that of *R. solani* infected wild type plants using beta actin as endogenous control. Graph  
 595 shows mean values  $\pm$  standard error of at least three technical replicates. For each gene,  
 596 different letters indicate significant difference at  $P < 0.05$  (estimated using one-way  
 597 ANOVA). Similar results were obtained in two different biological repeats.

598

599

600

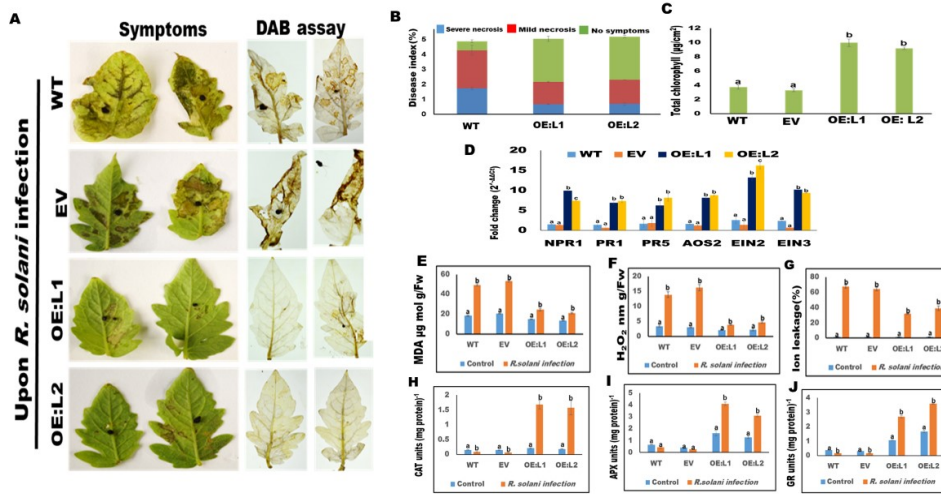

601

602 **Fig. 7.** Overexpression of *SIRAV1* provides resistance against *R. solani* infection in tomato.  
 603 (A) Disease symptoms, (B) Disease index (in terms observed necrotic symptoms) and (C)  
 604 Total chlorophyll content in the *R. solani* infected tomato leaves at 4 dpi. (D) Expression  
 605 analysis of SA, JA and ET mediated marker genes in the infected samples. The relative  
 606 expression was quantified with respect to uninfected samples using beta actin as internal  
 607 control. (E) MDA content, (F) H<sub>2</sub>O<sub>2</sub> content, (G) ion leakage (%) and the enzymatic  
 608 activities of various antioxidant markers, (H) CAT, (I) APX and (J) GR in the infected  
 609 plants. Graph shows mean values ± standard error of at least three technical replicates. For  
 610 each gene, different letters indicate significant difference at  $P < 0.05$  (estimated using one-  
 611 way ANOVA). Similar results were obtained in at least three biological repeats.  
 612

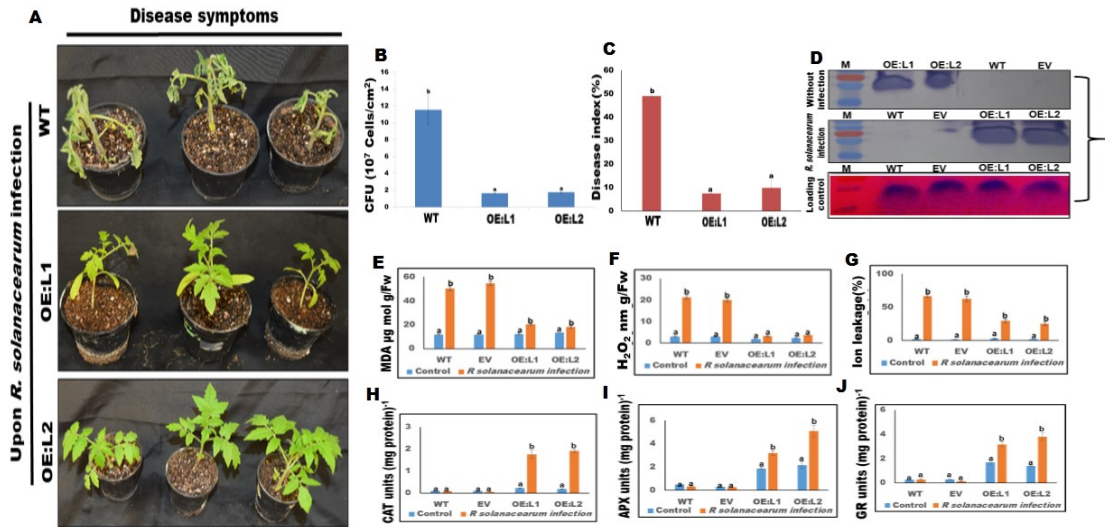

613

614 **Fig. 8.** Overexpression of *SIRAV1* provides resistance against *R. solanacearum* infection in  
 615 tomato. (A) Disease symptoms, (B) The pathogen load (CFU/ml) and (C) disease index (%  
 616 of plants with wilting symptoms) in drench inoculated *R. solanacearum* infected tomato  
 617 plants at 7dpi. (D) Western-blot analysis reflecting the accumulation of His-tagged SIRAV1  
 618 protein in tomato plants with or without *R. solanacearum* infection. (E) MDA content, (F)  
 619 H $_2$ O $_2$  content, (G) ion leakage (%) and the enzymatic activities of various antioxidant  
 620 markers, (H) CAT, (I) APX and (J) GR in the infected plants. Graph shows mean values  $\pm$   
 621 standard error of at least three technical replicates. For each gene, different letters indicate  
 622 significant difference at  $P < 0.05$  (estimated using one-way ANOVA). Similar results were  
 623 obtained in three biological repeats.

624

625

626

627

628

629

630

631

632

633

634



635 **References**

- 636 1. J. D. G. Jones, J. L. Dangl, The plant immune system. *Nature* **444**, 323–9  
637 (2006).
- 638 2. Z. Ma, *et al.*, A *Phytophthora sojae* Glycoside Hydrolase 12 Protein Is a  
639 Major Virulence Factor during Soybean Infection and Is Recognized as a  
640 PAMP. *Plant Cell* (2015) <https://doi.org/10.1105/tpc.15.00390>.
- 641 3. C. Zipfel, *et al.*, Perception of the Bacterial PAMP EF-Tu by the Receptor  
642 EFR Restricts Agrobacterium-Mediated Transformation. *Cell* (2006)  
643 <https://doi.org/10.1016/j.cell.2006.03.037>.
- 644 4. S. Stael, *et al.*, Plant innate immunity - sunny side up? *Trends Plant Sci.*  
645 (2015) <https://doi.org/10.1016/j.tplants.2014.10.002>.
- 646 5. S. H. Spoel, X. Dong, How do plants achieve immunity? Defence without  
647 specialized immune cells. *Nat. Rev. Immunol.* **12**, 89–100 (2012).
- 648 6. S. T. Chisholm, G. Coaker, B. Day, B. J. Staskawicz, Host-microbe  
649 interactions: shaping the evolution of the plant immune response. *Cell*  
650 **124**, 803–814 (2006).
- 651 7. L. Bacete, H. Mélida, E. Miedes, A. Molina, Plant cell wall-mediated  
652 immunity: cell wall changes trigger disease resistance responses. *Plant J.*  
653 (2018) <https://doi.org/10.1111/tbj.13807>.
- 654 8. L. Wang, *et al.*, Integrated transcriptome and hormone profiling highlight  
655 the role of multiple phytohormone pathways in wheat resistance against  
656 fusarium head blight. *PLoS One* (2018)  
657 <https://doi.org/10.1371/journal.pone.0207036>.
- 658 9. V. Verma, P. Ravindran, P. P. Kumar, Plant hormone-mediated regulation  
659 of stress responses. *BMC Plant Biol.* (2016)  
660 <https://doi.org/10.1186/s12870-016-0771-y>.
- 661 10. L. Caarls, *et al.*, Assessing the role of ETHYLENE RESPONSE FACTOR  
662 transcriptional repressors in salicylic acid-mediated suppression of  
663 jasmonic acid-responsive genes. *Plant Cell Physiol.* (2017)  
664 <https://doi.org/10.1093/pcp/pcw187>.
- 665 11. W. F. Broekaert, S. L. Delauré, M. F. C. De Bolle, B. P. A. Cammue, The  
666 role of ethylene in host-pathogen interactions. *Annu. Rev. Phytopathol.* **44**,  
667 393–416 (2006).



- 668 12. M. T. Nishimura, J. L. Dangl, Arabidopsis and the plant immune system.  
669 *Plant J.* (2010) <https://doi.org/10.1111/j.1365-313X.2010.04131.x>.
- 670 13. M. L. Berens, H. M. Berry, A. Mine, C. T. Argueso, K. Tsuda, Evolution  
671 of Hormone Signaling Networks in Plant Defense. *Annu. Rev.*  
672 *Phytopathol.* **55**, annurev-phyto-080516-035544 (2017).
- 673 14. A. Robert-Seilaniantz, M. Grant, J. D. G. Jones, Hormone Crosstalk in  
674 Plant Disease and Defense: More Than Just JASMONATE-  
675 SALICYLATE Antagonism. *Annu. Rev. Phytopathol.* **49**, 317–343  
676 (2011).
- 677 15. N. Peeters, A. Guidot, F. Vailleau, M. Valls, *Ralstonia solanacearum*, a  
678 widespread bacterial plant pathogen in the post-genomic era. *Mol. Plant*  
679 *Pathol.* (2013) <https://doi.org/10.1111/mpp.12038>.
- 680 16. S. Genin, Molecular traits controlling host range and adaptation to plants  
681 in *Ralstonia solanacearum*. *New Phytol.* (2010)  
682 <https://doi.org/10.1111/j.1469-8137.2010.03397.x>.
- 683 17. A. C. Hayward, Biology and Epidemiology of Bacterial Wilt Caused by  
684 *Pseudomonas Solanacearum*. *Annu. Rev. Phytopathol.* **29**, 65–87 (1991).
- 685 18. S. Ghosh, S. K. Gupta, G. Jha, Identification and functional analysis of  
686 AG1-IA specific genes of *Rhizoctonia solani*. *Curr. Genet.* **60**, 327–341  
687 (2014).
- 688 19. G. Yang, C. Li, “General Description of *Rhizoctonia* Species Complex” in  
689 *Plant Pathology*, (2012) <https://doi.org/10.5772/39026>.
- 690 20. E. Moriones, S. Praveen, S. Chakraborty, Tomato leaf curl new delhi  
691 virus: An emerging virus complex threatening vegetable and fiber crops.  
692 *Viruses* (2017) <https://doi.org/10.3390/v9100264>.
- 693 21. C. Albrecht, *et al.*, Brassinosteroids inhibit pathogen-associated molecular  
694 pattern-triggered immune signaling independent of the receptor kinase  
695 BAK1. *Proc. Natl. Acad. Sci.* **109**, 303–308 (2012).
- 696 22. H. He, *et al.*, Pm21 , Encoding a Typical CC-NBS-LRR Protein, Confers  
697 Broad-Spectrum Resistance to Wheat Powdery Mildew Disease. *Mol.*  
698 *Plant* (2018) <https://doi.org/10.1016/j.molp.2018.03.004>.
- 699 23. R. Backer, S. Naidoo, N. van den Berg, The NONEXPRESSOR OF  
700 PATHOGENESIS-RELATED GENES 1 (NPR1) and Related Family:

- 701 Mechanistic Insights in Plant Disease Resistance. *Front. Plant Sci.* **10**, 102  
702 (2019).
- 703 24. K. M. Pajerowska-Mukhtar, D. K. Emerine, M. S. Mukhtar, Tell me more:  
704 Roles of NPRs in plant immunity. *Trends Plant Sci.* (2013)  
705 <https://doi.org/10.1016/j.tplants.2013.04.004>.
- 706 25. S. Lacombe, *et al.*, Interfamily transfer of a plant pattern-recognition  
707 receptor confers broad-spectrum bacterial resistance. *Nat. Biotechnol.* **28**,  
708 365–369 (2010).
- 709 26. J. E. Lincoln, *et al.*, Expression of the antiapoptotic baculovirus p35 gene  
710 in tomato blocks programmed cell death and provides broad-spectrum  
711 resistance to disease. *Proc. Natl. Acad. Sci.* (2002)  
712 <https://doi.org/10.1073/pnas.232579799>.
- 713 27. R. Nelson, T. Wiesner-Hanks, R. Wisser, P. Balint-Kurti, Navigating  
714 complexity to breed disease-resistant crops. *Nat. Rev. Genet.* (2018)  
715 <https://doi.org/10.1038/nrg.2017.82>.
- 716 28. Y. Kagaya, K. Ohmiya, T. Hattori, RAV1, a novel DNA-binding protein,  
717 binds to bipartite recognition sequence through two distinct DNA-binding  
718 domains uniquely found in higher plants. *Nucleic Acids Res.* **27**, 470–478  
719 (1999).
- 720 29. C. Z. Feng, *et al.*, Arabidopsis RAV1 transcription factor, phosphorylated  
721 by SnRK2 kinases, regulates the expression of ABI3, ABI4, and ABI5  
722 during seed germination and early seedling development. *Plant J.* **80**,  
723 654–668 (2014).
- 724 30. H. R. Woo, *et al.*, The RAV1 transcription factor positively regulates leaf  
725 senescence in Arabidopsis. *J. Exp. Bot.* (2010)  
726 <https://doi.org/10.1093/jxb/erq206>.
- 727 31. M. S. Mukhtar, *et al.*, Plant Immune System Network. *Science* (80-. ).  
728 **333**, 596–601 (2011).
- 729 32. Y. T. Cheng, *et al.*, Stability of plant immune-receptor resistance proteins  
730 is controlled by SKP1-CULLIN1-F-box (SCF)-mediated protein  
731 degradation. *Proc. Natl. Acad. Sci.* **108**, 14694–14699 (2011).
- 732 33. Y. Liu, *et al.*, Phosphorylation of an ERF Transcription Factor by  
733 Arabidopsis MPK3/MPK6 Regulates Plant Defense Gene Induction and

- 734 Fungal Resistance. *Plant Cell* (2013)  
735 <https://doi.org/10.1105/tpc.112.109074>.
- 736 34. M. Zhang, J. Su, Y. Zhang, J. Xu, S. Zhang, Conveying endogenous and  
737 exogenous signals: MAPK cascades in plant growth and defense. *Curr.*  
738 *Opin. Plant Biol.* **45**, 1–10 (2018).
- 739 35. J. Jelenska, J. A. van Hal, J. T. Greenberg, *Pseudomonas syringae* hijacks  
740 plant stress chaperone machinery for virulence. *Proc. Natl. Acad. Sci.*  
741 (2010) <https://doi.org/10.1073/pnas.0910943107>.
- 742 36. C. J. Park, Y. S. Seo, Heat shock proteins: A review of the molecular  
743 chaperones for plant immunity. *Plant Pathol. J.* (2015)  
744 <https://doi.org/10.5423/PPJ.RW.08.2015.0150>.
- 745 37. G. Kong, *et al.*, The Activation of Phytophthora Effector Avr3b by Plant  
746 Cyclophilin is Required for the Nudix Hydrolase Activity of Avr3b. *PLoS*  
747 *Pathog.* **11**, 1–22 (2015).
- 748 38. J. R. Dominguez-Solis, *et al.*, A cyclophilin links redox and light signals  
749 to cysteine biosynthesis and stress responses in chloroplasts. *Proc. Natl.*  
750 *Acad. Sci. U. S. A.* **105**, 16386–91 (2008).
- 751 39. G. J. M. Beckers, *et al.*, Mitogen-Activated protein kinases 3 and 6 are  
752 required for full priming of stress responses in *Arabidopsis thaliana*. *Plant*  
753 *Cell* (2009) <https://doi.org/10.1105/tpc.108.062158>.
- 754 40. K. H. Sohn, S. C. Lee, H. W. Jung, J. K. Hong, B. K. Hwang, Expression  
755 and functional roles of the pepper pathogen-induced transcription factor  
756 RAV1 in bacterial disease resistance, and drought and salt stress tolerance.  
757 *Plant Mol. Biol.* **61**, 897–915 (2006).
- 758 41. A. Djamei, A. Pitzschke, H. Nakagami, I. Rajh, H. Hirt, Trojan horse  
759 strategy in *Agrobacterium* transformation: Abusing MAPK defense  
760 signaling. *Science* (80-. ). (2007) <https://doi.org/10.1126/science.1148110>.
- 761 42. B. Li, X. Meng, L. Shan, P. He, Transcriptional Regulation of Pattern-  
762 Triggered Immunity in Plants. *Cell Host Microbe* (2016)  
763 <https://doi.org/10.1016/j.chom.2016.04.011>.
- 764 43. G. Mao, *et al.*, Phosphorylation of a WRKY Transcription Factor by Two  
765 Pathogen-Responsive MAPKs Drives Phytoalexin Biosynthesis in  
766 *Arabidopsis*. *Plant Cell* **23**, 1639–1653 (2011).

- 767 44. J. Su, *et al.*, Active photosynthetic inhibition mediated by MPK3/MPK6 is  
768 critical to effector-triggered immunity. *PLoS Biol.* (2018)  
769 <https://doi.org/10.1371/journal.pbio.2004122>.
- 770 45. S. C. Popescu, *et al.*, MAPK target networks in *Arabidopsis thaliana*  
771 revealed using functional protein microarrays. *Genes Dev.* (2009)  
772 <https://doi.org/10.1101/gad.1740009>.
- 773 46. X. Meng, *et al.*, Phosphorylation of an ERF Transcription Factor by  
774 *Arabidopsis* MPK3/MPK6 Regulates Plant Defense Gene Induction and  
775 Fungal Resistance. *Plant Cell* **25**, 1126–1142 (2013).
- 776 47. P. Singh, A. K. Sinha, A Positive Feedback Loop Governed by SUB1A1  
777 Interaction with MITOGEN-ACTIVATED PROTEIN KINASE3 Imparts  
778 Submergence Tolerance in Rice. *Plant Cell* (2016)  
779 <https://doi.org/10.1105/tpc.15.01001>.
- 780 48. B. Huot, J. Yao, B. L. Montgomery, S. Y. He, Growth-defense tradeoffs in  
781 plants: A balancing act to optimize fitness. *Mol. Plant* **7**, 1267–1287  
782 (2014).
- 783 49. K. J. P. Silva, A. Brunings, N. A. Peres, Z. Mou, K. M. Folta, The  
784 *Arabidopsis* NPR1 gene confers broad-spectrum disease resistance in  
785 strawberry. *Transgenic Res.* **24**, 693–704 (2015).
- 786 50. R. A. Gutierrez, R. M. Ewing, J. M. Cherry, P. J. Green, Identification of  
787 unstable transcripts in *Arabidopsis* by cDNA microarray analysis: Rapid  
788 decay is associated with a group of touch- and specific clock-controlled  
789 genes. *Proc. Natl. Acad. Sci.* **99**, 11513–11518 (2002).
- 790 51. M. S. Mukhtar, *et al.*, Independently evolved virulence effectors converge  
791 onto hubs in a plant immune system network. *Science* **333**, 596–601  
792 (2011).
- 793 52. M. M. Brandão, L. L. Dantas, M. C. Silva-Filho, AtPIN: *Arabidopsis*  
794 *thaliana* protein interaction network. *BMC Bioinformatics* **10**, 454 (2009).
- 795 53. P. Shannon, A. Markiel, O. Ozier, N. Baliga, Cytoscape: a software  
796 environment for integrated models of biomolecular interaction networks.  
797 *Genome*, 2498–2504 (2003).
- 798 54. S. J. Clough, A. F. Bent, Floral dip: A simplified method for  
799 *Agrobacterium*-mediated transformation of *Arabidopsis thaliana*. *Plant J.*

- 800           **16**, 735–743 (1998).
- 801   55.   Y. Chen, GUS staining of guard cells to identify localised guard cell gene  
802           expression. *BIO-PROTOCOL* (2017)  
803           <https://doi.org/10.21769/bioprotoc.2446>.
- 804   56.   K. J. Livak, T. D. Schmittgen, Analysis of Relative Gene Expression Data  
805           Using Real- Time Quantitative PCR and the 2<sup>-ΔΔC<sub>T</sub></sup> Method.  
806           *METHODS* **25**, 402–408 (2001).
- 807   57.   D. M. Swain, *et al.*, A prophage tail-like protein is deployed by  
808           Burkholderia bacteria to feed on fungi. *Nat. Commun.* (2017)  
809           <https://doi.org/10.1038/s41467-017-00529-0>.
- 810   58.   D. I. Arnon, Copper Enzymes in Isolated Chloroplasts. Polyphenoloxidase  
811           in Beta Vulgaris. *Plant Physiol.* **24**, 1–15 (1949).
- 812   59.   D. Khokhani, T. M. Lowe-Power, T. M. Tran, C. Allen, A single regulator  
813           mediates strategic switching between attachment/spread and  
814           growth/virulence in the plant pathogen *Ralstonia solanacearum*. *MBio*  
815           (2017) <https://doi.org/10.1128/mBio.00895-17>.
- 816   60.   R. K. Chandan, *et al.*, Silencing of tomato CTR1 provides enhanced  
817           tolerance against Tomato leaf curl virus infection. *Plant Signal. Behav.*  
818           (2019) <https://doi.org/10.1080/15592324.2019.1565595>.
- 819   61.   D. M. Swain, *et al.*, Concurrent overexpression of rice G-protein β and γ  
820           subunits provide enhanced tolerance to sheath blight disease and abiotic  
821           stress in rice. *Planta* (2019) <https://doi.org/10.1007/s00425-019-03241-z>.
- 822   62.   R. Kant, K. Tyagi, S. Ghosh, G. Jha, Host Alternative NADH:Ubiquinone  
823           Oxidoreductase Serves as a Susceptibility Factor to Promote Pathogenesis  
824           of *Rhizoctonia solani* in Plants . *Phytopathology* (2019)  
825           <https://doi.org/10.1094/phyto-02-19-0055-r>.
- 826   63.   B. Raghuram, A. H. Sheikh, Y. Rustagi, A. K. Sinha, MicroRNA  
827           biogenesis factor DRB1 is a phosphorylation target of mitogen activated  
828           protein kinase MPK3 in both rice and Arabidopsis. *FEBS J.* (2015)  
829           <https://doi.org/10.1111/febs.13159>.
- 830
- 831

832 **Supplementary information:**

833 **A cross talk of AtRAV1, an ethylene responsive transcription factor with MAP**  
834 **kinase imparts broad spectrum disease resistance in plants**

835

836 # Ravindra Kumar Chandan<sup>1,2</sup> (rjha.bhu@gmail.com)

837 # Rahul Kumar<sup>1</sup> (rahuls697@gmail.com)

838 # Durga Madhab Swain<sup>1</sup> (dsnanowizard@gmail.com)

839 Srayan Ghosh<sup>1</sup> (srayan@nipgr.ac.in)

840 Prakash Kumar Bhagat<sup>3</sup> (prakash@nipgr.ac.in)

841 Sunita Patel<sup>2</sup> (sunitapcug@gmail.com)

842 Ganesh Bagler<sup>4</sup> (bagler@iiitd.ac)

843 Alok Krishna Sinha<sup>3</sup> (alok@nipgr.ac.in)

844 Gopaljee Jha<sup>1,\*</sup> (jmsgopal@nipgr.ac.in; jmsgopal@gmail.com)

845

846 \* Corresponding Author:

847 Email: jmsgopal@nipgr.ac.in; jmsgopal@gmail.com

848 Tel: +91(0)1126735177

849 Fax: +91(0)1126741658

850 # These authors contribute equally to this work

851

852 1: Plant microbe interactions lab, National Institute of Plant Genome Research, Aruna  
853 Asaf Ali Marg, New Delhi-110067, India.

854 2: School of Life Sciences, Central University of Gujarat, Sector-30, Gandhinagar-  
855 382030, India.

856 3: National Institute of Plant Genome Research, Aruna Asaf Ali Marg, New Delhi-  
857 110067, India.

858 4: Centre for Computational Biology, Indraprastha Institute of Information Technology  
859 (IIIT-Delhi), New Delhi-110020, India.

860 **Short title:** RAV1 promotes disease resistance in plants

861

862

863

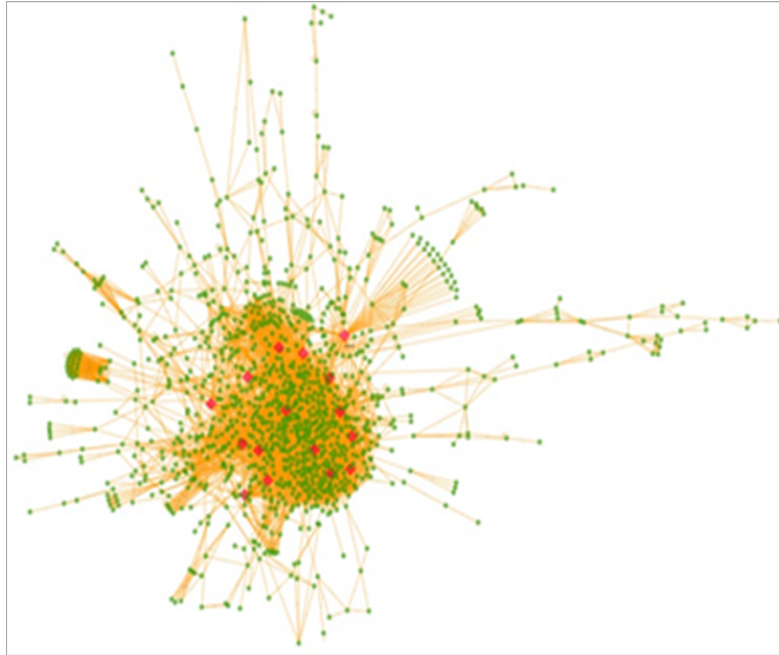

864

865

866 **Fig. S1.** Centrality of key defense proteins in Arabidopsis defense protein interaction  
867 network. Protein-protein interaction network of Arabidopsis defense proteins and their  
868 immediate interacting partners: ADPv1. The Arabidopsis defense proteins were  
869 mapped onto AtPIN and the interactome of these proteins and their immediate interactors  
870 was extracted using Cytoscape. A complex network with 6051 interactions amongst 1343  
871 proteins was observed. Central nature of key plant defense interactome proteins was  
872 identified using network metrics. Sixteen key defense proteins are highlighted onto  
873 ADPv1 in red.

874

875

876

877

878

879

880



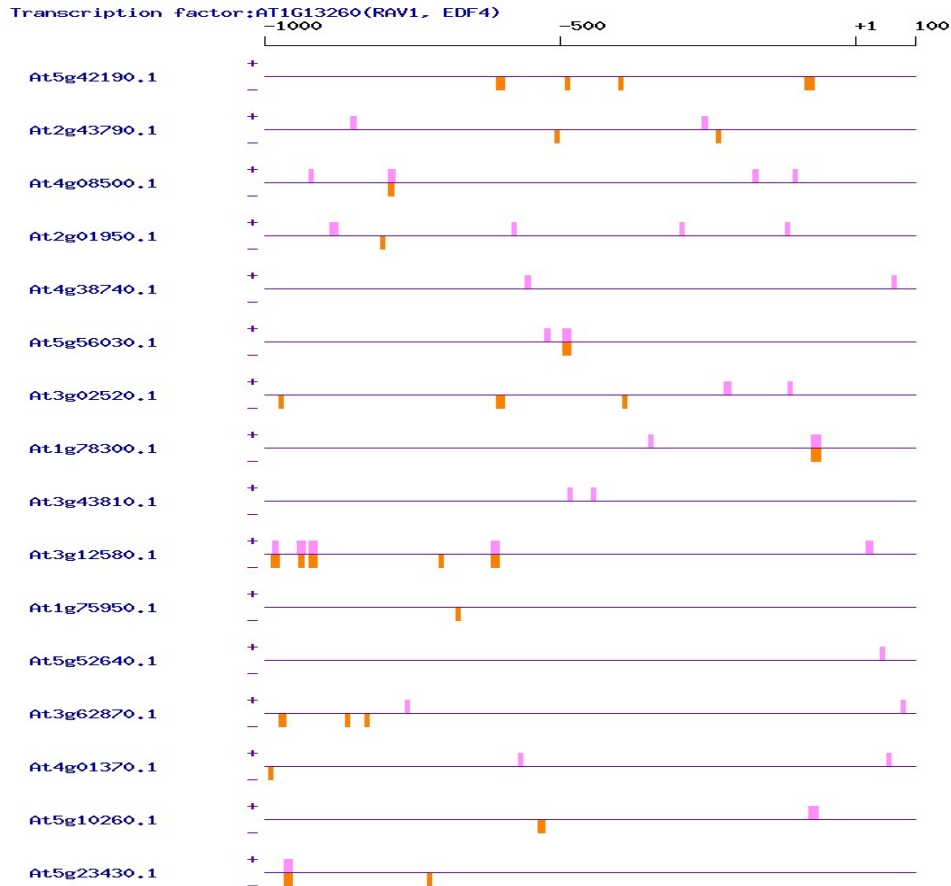

881

882 **Fig. S2.** The AtRAV1 transcription factor (AT1G13260) binding sites in the promoter  
883 region of key defense genes. The AtRAV1 transcription factor (AT1G13260) binding  
884 sites in the promoter region in each of the 16 key defense genes are represented as  
885 vertical bars. The violet colour indicates binding sites in the negative strand while pink  
886 colour indicates binding sites in the positive strand.

887

888

889

890

891

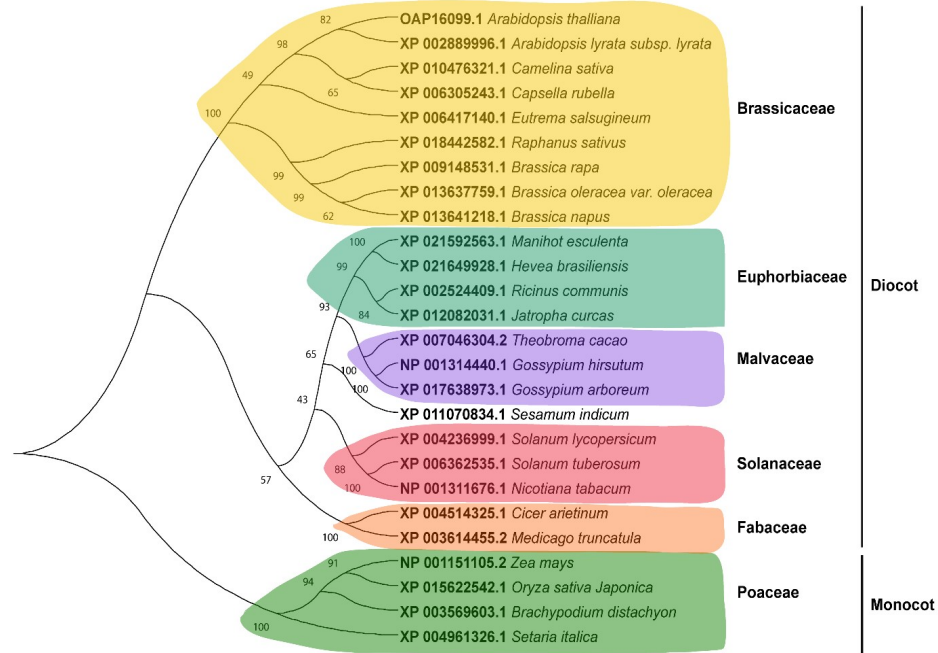

892

893 **Fig. S3.** Phylogenetic analysis of RAV1 proteins. The bootstrap values are indicated at  
 894 each branch node. The evolutionary distances were computed using the Poisson  
 895 correction method and are in the units of the number of amino acid substitutions per site.  
 896 The evolutionary analysis was conducted in MEGA X using Neighbor-Joining method.

897

898

899

900

901

902

903

904

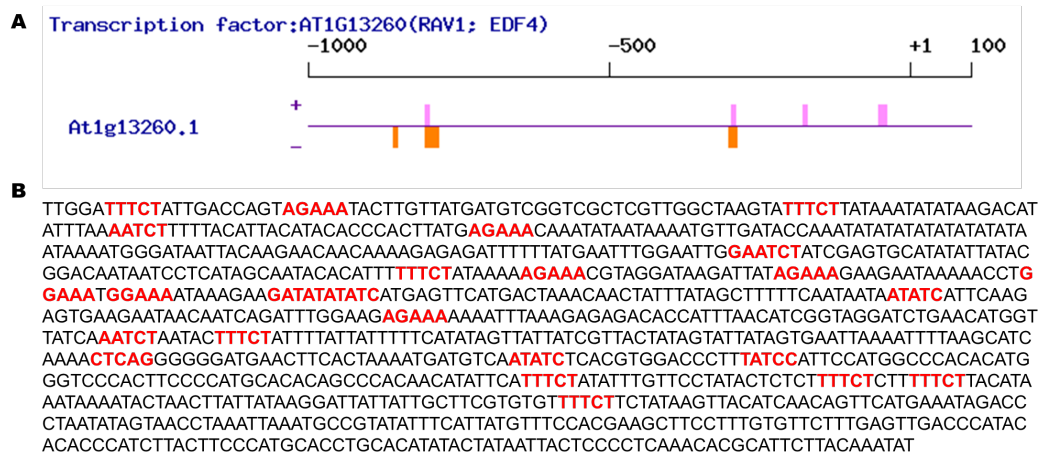

905

906

**Fig. S4.** Potential RAV1 binding sites present in the promoter of *AtRAV1*. (A) Schematic

907

view depicting the presence of potential RAV1 transcription factor binding sites in the

908

*AtRAV1* promoter. The violet colour indicates binding sites in negative strand while pink

909

colour indicates binding sites in the positive strand. (B) The potential RAV1 binding

910

motifs are highlighted in the *AtRAV1* promoter region. Eight distinct RAV1 binding

911

motifs [AGAAA (5), TTTCT (8), AATCT (3), GGAAA (2), GATAT (1), ATATC (3),

912

CTCAG (1) and TATCC (1)], are highlighted.

913

914

915

916

917

918

919

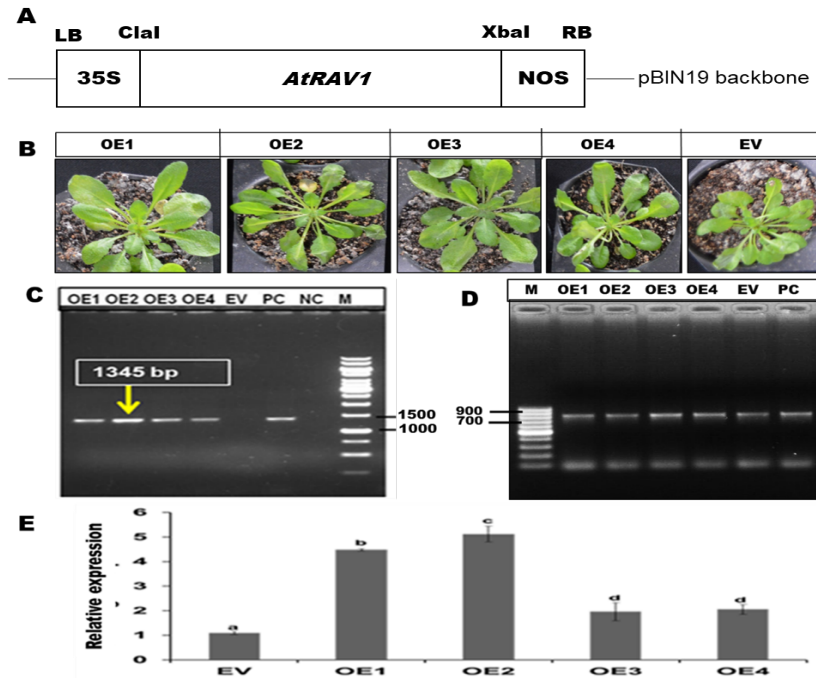

920

921 **Fig. S5.** Characterization of transgenic *A. thaliana* lines. (A) The pGJ100 binary vector  
922 map that was used for generating transgenic lines. (B) The representative photographs of  
923 *AtRAV1* overexpressing (OEs) and empty vector (EV) transgenic plants. (C) PCR product  
924 using CaMV 35S F and RAV1OX-R primer pair. PC (positive control) represents PCR  
925 product obtained using plasmid of pGJ100 containing 35S:*AtRAV1*; NC (negative  
926 control) reflects no template control and M: represents DNA marker. (D) PCR product  
927 using NptII-F and NptII-R primers, highlighting the integration of T-DNA in both OE  
928 and EV transgenic lines. (E) Relative gene expression of *AtRAV1* in different OE and EV  
929 lines, when normalized with the expression in wild type (WT) plants using beta-actin as  
930 housekeeping gene. Graph shows mean values  $\pm$  standard error of at least three biological  
931 replicates. Values with different letters are significantly different at  $P < 0.05$  (estimated  
932 using one-way ANOVA)

933

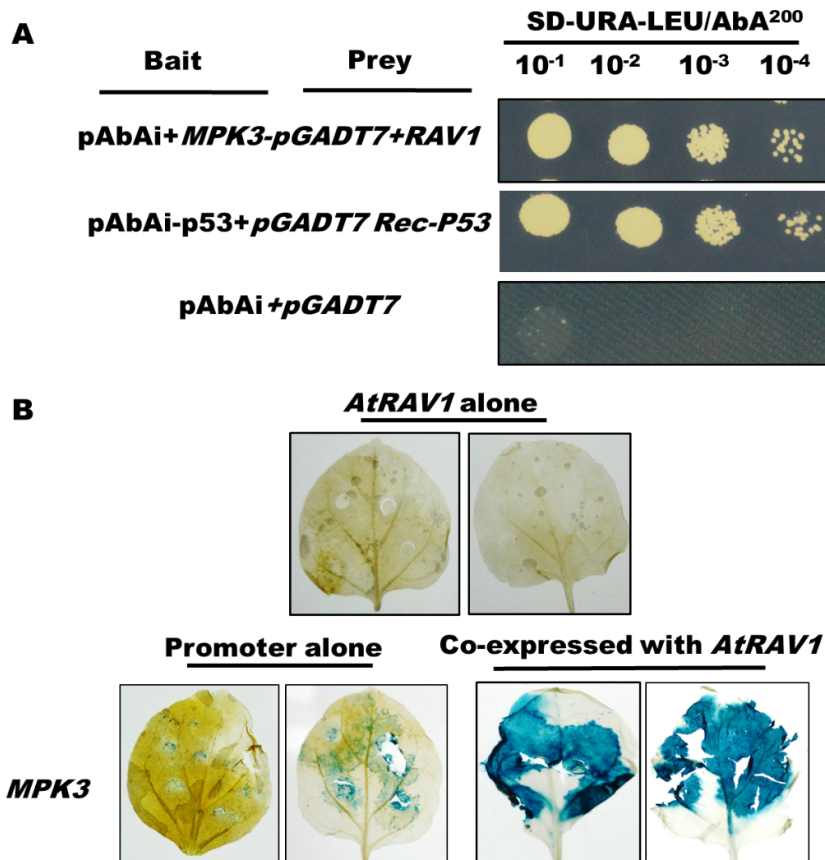

934

935 **Fig. S6.** *AtRAV1* induces the expression of *AtMPK3* by potentially binding to its  
936 promoter. (A) Yeast one hybrid assay: growth of yeast cells on SD-URA-LEU medium in  
937 presence of AbA (Aureobasidin A) reflects that *AtRAV1* transactivates the expression of  
938 AbA gene under *AtMPK3* promoter. The pAbAi-p53+pGADT7Rec-P53 was used as a  
939 positive control while the empty vector of pAbAi + pGADT7 was used as negative  
940 control. (B) GUS based reporter assay suggesting that *AtRAV1* activates GUS  
941 expression driven through the promoter of *AtMPK3* gene in *N. benthamiana*.

942

943

944

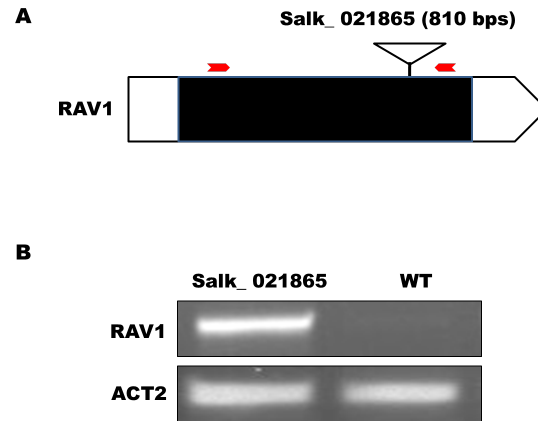

945

946 **Fig. S7.** Validation of *atrav1* mutant line (Salk\_021865). (A) The position of T-DNA  
947 insertion (marked by inverted triangles) in *AtRAV1* gene in. Red arrow indicates the  
948 positions of primers used to validate T-DNA insertion. (B) PCR product showing T-DNA  
949 insertion in *atrav1* mutant. *ACT2* (beta actin) gene of *A. thaliana* was used as loading  
950 control.

951

952

953

954

955

956

957

958

959

960

961

962

963

964

965

966

967

968



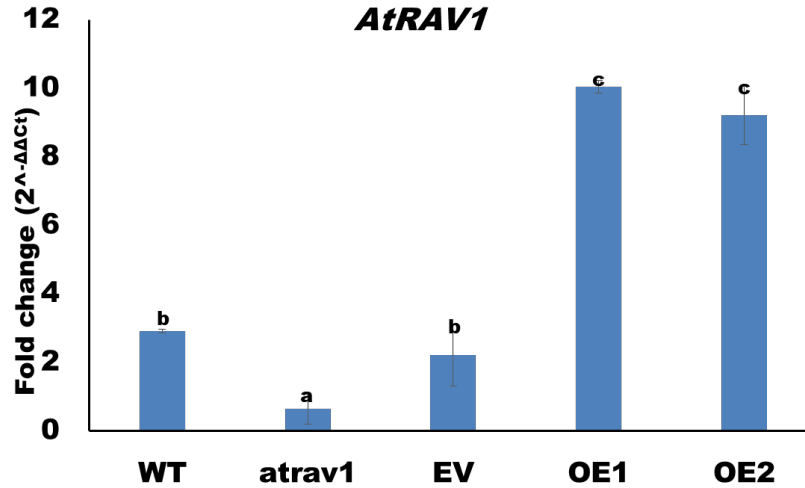

969

970 **Fig. S8.** The pathogen infection induces the expression of *AtRAV1*. The relative  
971 expression of *AtRAV1* gene in *R. solani* infected *A. thaliana* plants are summarized as bar  
972 chart. The relative expression was quantified by normalizing the expression with the  
973 uninfected samples using beta actin as endogenous control. Graph shows mean values ±  
974 standard error of at least three technical replicates. Values with different letters are  
975 significantly different at  $P < 0.05$  (estimated using one-way ANOVA). Similar results  
976 were obtained in three biological repeats.

977

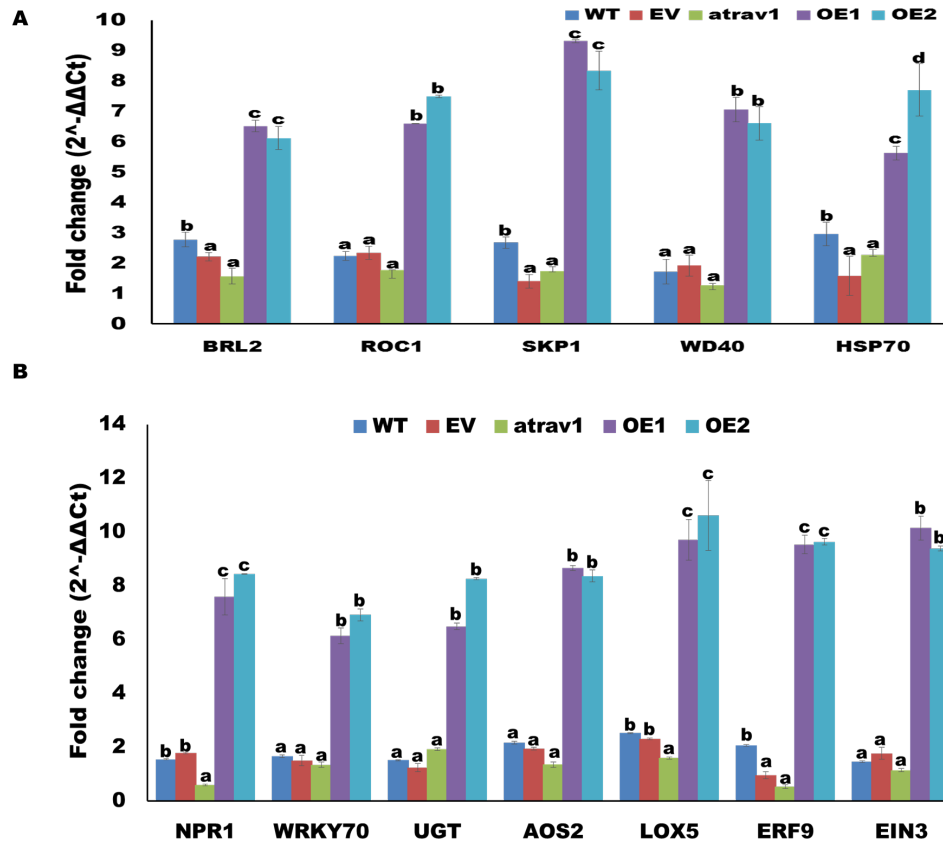

978

979 **Fig. S9.** *R. solani* infection enhances the expression of key defense and defense marker  
 980 genes in *AtRAVI* overexpression lines. The expression of (A) selected key defense genes  
 981 and (B) Defense marker genes in *R. solani* infected lines. The relative expression was  
 982 quantified by normalizing the expression with uninfected samples using beta actin as  
 983 endogenous control. Graph shows mean values  $\pm$  standard error of at least three technical  
 984 replicates. For each gene, different letters indicate significant difference at  $P < 0.05$   
 985 (estimated using one-way ANOVA). Similar results were obtained in three biological  
 986 repeats.

987

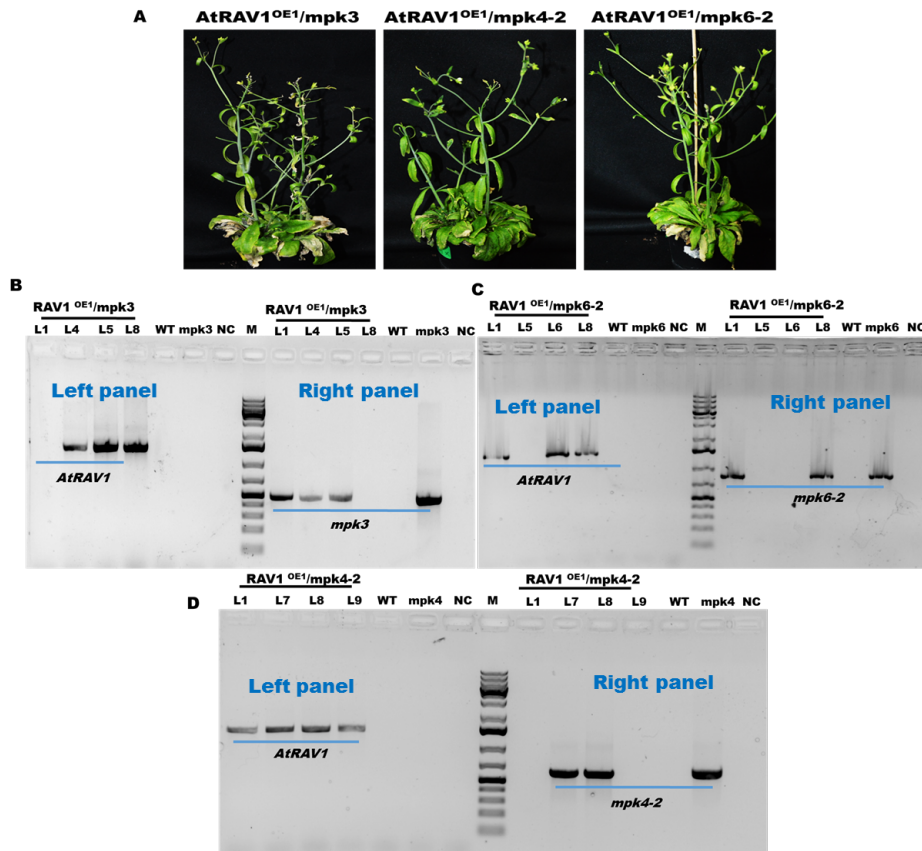

988

989 **Fig. S10.** Validation of *AtRAV1*<sup>OE1</sup>/mpk3, *AtRAV1*<sup>OE1</sup>/mpk4-2 and *AtRAV1*<sup>OE1</sup>/mpk6-2  
990 lines in *A. thaliana*. (A) The representative images of different plants (*AtRAV1*<sup>OE1</sup>/mpk3,  
991 *AtRAV1*<sup>OE1</sup>/mpk4-2 and *AtRAV1*<sup>OE1</sup>/mpk6-2). B, C and D right panel represent PCR  
992 based validation of T-DNA insertion of different MAP kinase knockout mutant (mpk3,  
993 mpk4-2 and mpk6-2) in *AtRAV1* OE1 lines using T-DNA border primer and gene  
994 specific reverse primer (BP+RP). B, C and D left panel represent presence of *AtRAV1*  
995 transgene was confirmed by PCR using CaMV 35S F and RAV1OX-R primer. Negative  
996 control (NC) reflects no template control.

997

998

999

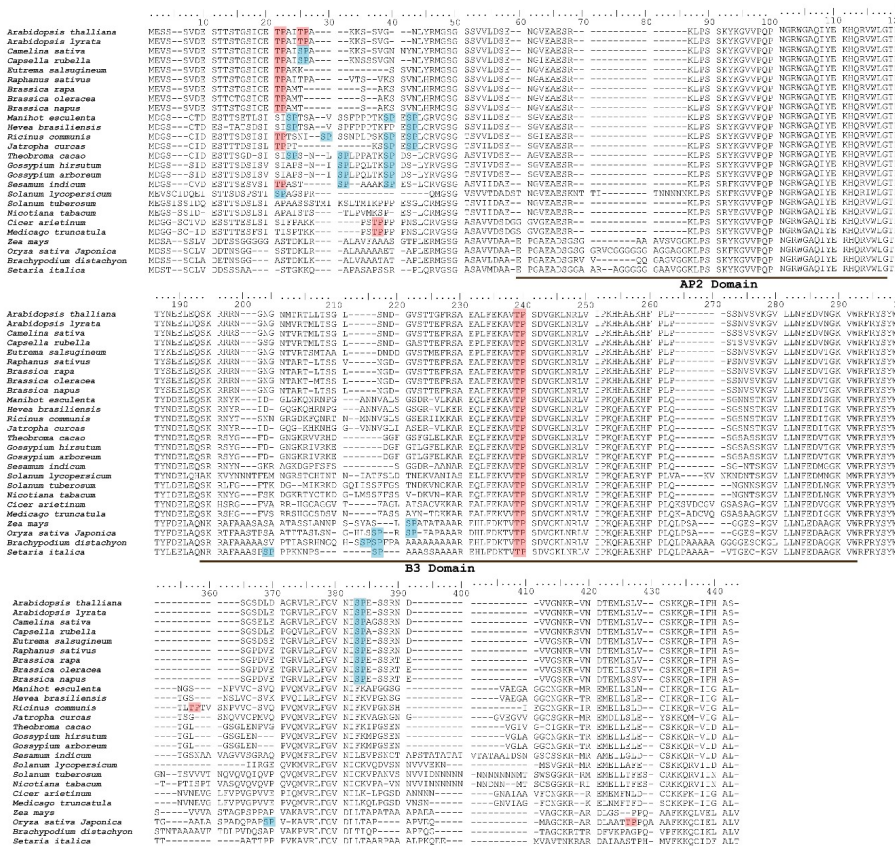

1000  
1001  
1002  
1003  
1004  
1005  
1006  
1007  
1008  
1009  
1010  
1011

**Fig. S11.** ClustalW alignment of RAV1 protein sequences in different plants. Presence of conserved AP2 and B3 domain region and potential MAP kinase phosphorylation sites (TP in red and SP in blue) in RAV1 amino acid sequence is highlighted.

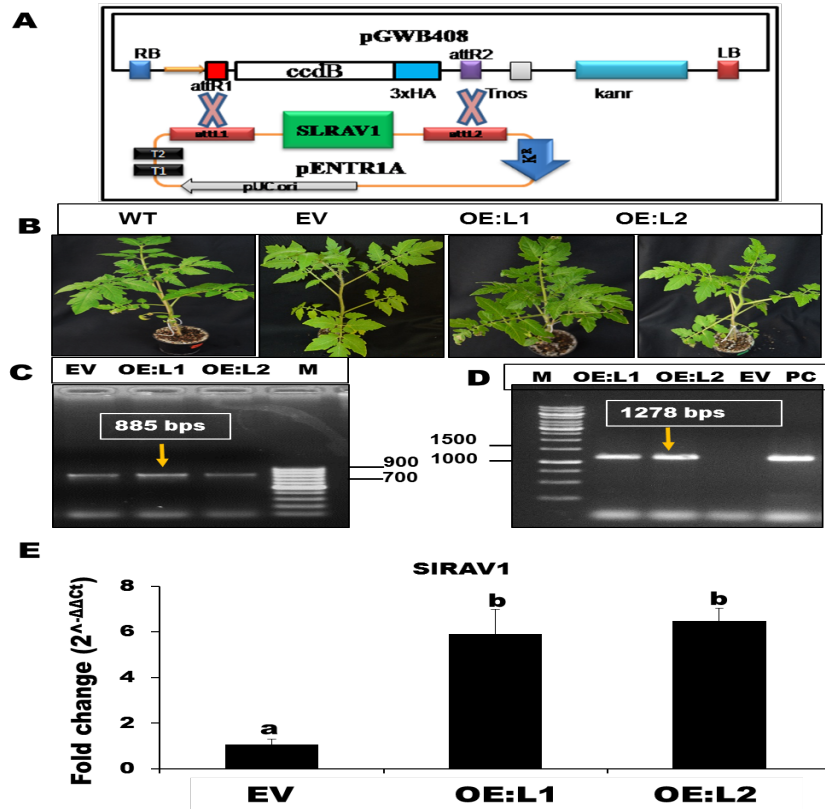

1012

1013 **Fig. S12.** Characterization of transgenic tomato lines. (A) T-DNA map of pGWB408  
 1014 gateway binary vector that was used for generating transgenic lines in tomato. (B) The  
 1015 representative images of empty vector (EV) and *SIRAV1* overexpressing (OEs) transgenic  
 1016 plants. (C) Presence of T-DNA (885 bp) confirmed by PCR using NptII-F and NptII-R  
 1017 primer. (D) Presence of *SIRAV1* transgene (1278bp) confirmed by PCR using CaMV 35S  
 1018 F and SIRAV1OE-R primer. Positive control (PC) represents PCR product obtained from  
 1019 recombinant plasmid (pGWB408 containing 35S:*SIRAV1*). (E) Relative gene expression  
 1020 of *SIRAV1* in different OE and EV lines, upon normalization with respect to WT plants.  
 1021 Graph shows mean values  $\pm$  standard error of at least three technical replicates. Values  
 1022 with different letters are significantly different at  $P < 0.05$  (estimated using one-way  
 1023 ANOVA). Similar results were obtained in three biological repeats.

1024

1025

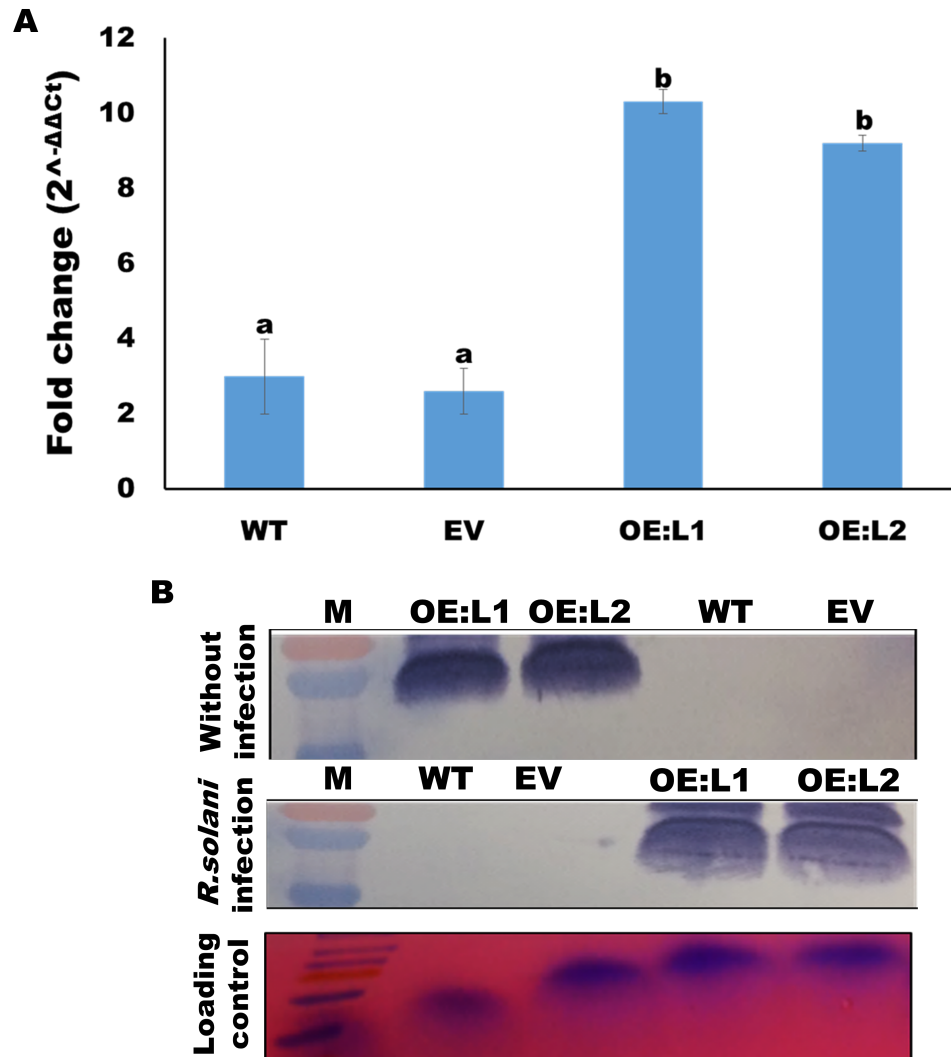

1026  
1027 **Fig. S13.** *R. solani* infection upregulates the expression of SIRAV1 in tomato.  
1028 (A) The relative expression of *SIRAV1* gene in *R. solani* infected (4 dpi) tomato  
1029 leaves are summarized as bar chart. The relative expression was quantified by  
1030 normalizing the expression with uninfected samples using beta actin as  
1031 endogenous control. Graph shows mean values  $\pm$  standard error of at least three  
1032 technical replicates. Values with different letters are significantly different at  $P <$   
1033  $0.05$  (estimated using one-way ANOVA). (B) Western-blot analysis reflecting  
1034 the accumulation of His-tagged version of SIRAV1 protein in different tomato  
1035 plants with or without *R. solani* infection. Similar results were obtained in three  
1036 biological repeats.  
1037



1038

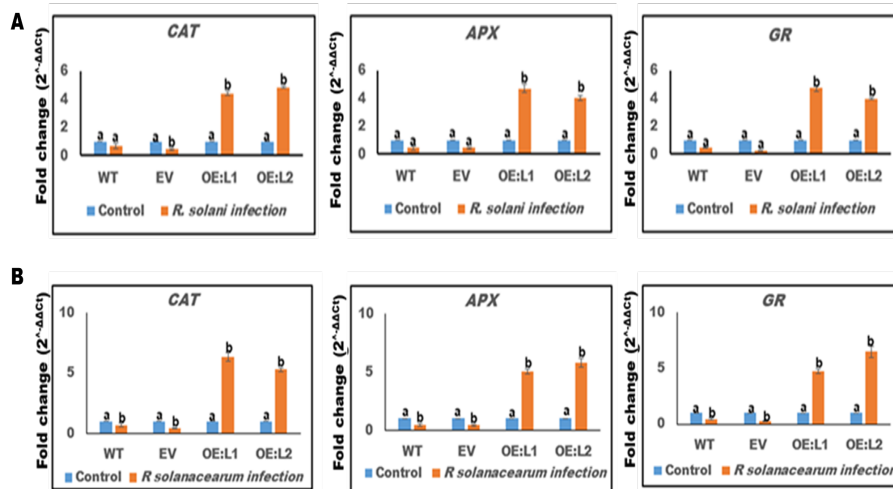

1039

1040 **Fig. S14.** Expression analysis of different antioxidant marker genes upon *R. solani* and *R.*  
1041 *solanacearum* infection. The relative expression of various antioxidant marker genes  
1042 (*CAT*, *APX* and *GR*) in (A) *R. solani* (4 dpi) and (B) *R. solanacearum* (7 dpi) infected  
1043 tomato leaves. The relative expression was quantified by normalizing the expression with  
1044 uninfected samples using beta actin as endogenous control. Graph shows mean values  $\pm$   
1045 standard error of at least three technical replicates. Values with different letters are  
1046 significantly different at  $P < 0.05$  (estimated using one-way ANOVA). Similar results  
1047 were obtained in three biological repeats.

1048

1049

1050

1051

1052

1053

1054

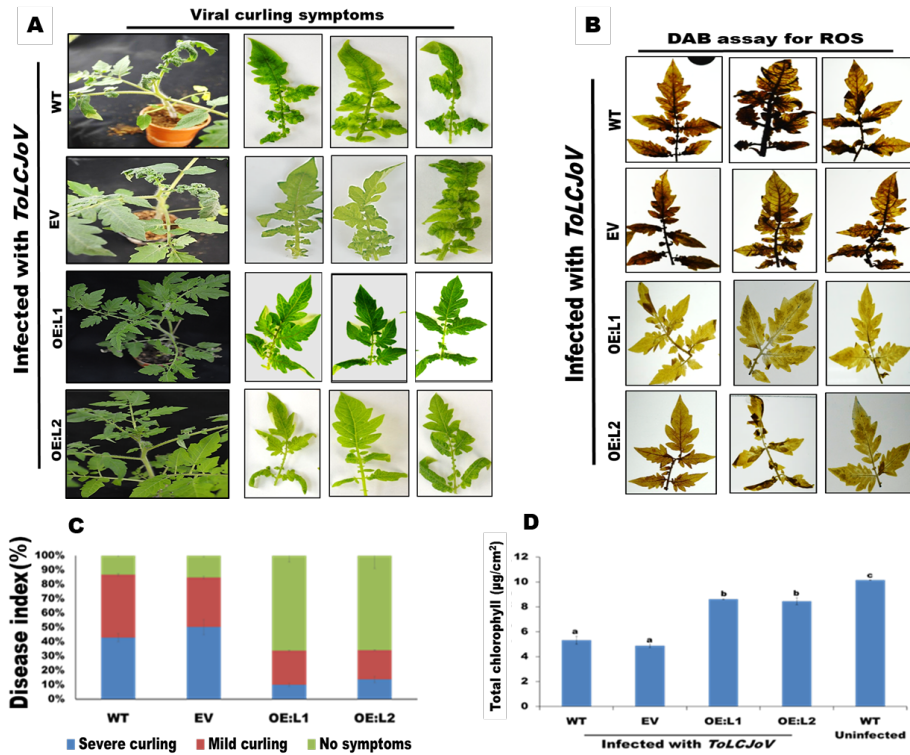

1055

1056

1057

1058 **Fig. S15.** *SIRAV1* overexpression provides tolerance against *Tomato leaf curl Joydepur*

1059 *virus (ToLCJoV)* infections in tomato. (A) Disease symptoms (leaf curling) in *ToLCJoV*

1060 infected tomato at 21 dpi. (B) DAB staining of *ToLCJoV* infected tomato leaves. (C)

1061 Observed disease symptoms in *ToLCJoV* infected tomato leaves plotted as disease index.

1062 (D) Total chlorophyll content in *ToLCJoV* infected tomato leaves at 21 dpi. Graph shows

1063 mean values  $\pm$  standard error of at least three technical replicates. Values with different

1064 letters are significantly different at  $P < 0.05$  (estimated using one-way ANOVA). Similar

1065 results were obtained in three biological repeats.

1066

1067

1068

1069

1070

1071

1072

1073

1074 **Table S1.** RAV1 binding motifs in the promoter region of selected key  
 1075 defence genes.

| Gene name | Promoter region having potential AtRAV1 binding sites | Number of RAV1 binding motifs |
|-----------|-------------------------------------------------------|-------------------------------|
| MPK4      | -124 to -1858                                         | 3                             |
| ROC1      | -169 to -1812                                         | 11                            |
| WD40      | -133 to -1775                                         | 6                             |
| BRL2      | -40 to -1916                                          | 9                             |
| SKP1      | -167 to -1906                                         | 6                             |
| HSP70     | -103 to -1806                                         | 11                            |

1076

1077 **Table S2.** List of Salicylic acid, Jasmonic acid and Ethylene (SA, JA and  
 1078 ET) mediated defense marker gene used in this study.

| Sl. no. | TAIR ID.         | Gene name                | Function                                                                                                                                                                            | Reference |
|---------|------------------|--------------------------|-------------------------------------------------------------------------------------------------------------------------------------------------------------------------------------|-----------|
| 1.      | <i>Atlg64280</i> | <i>AtNPR1</i>            | Induced systemic resistance against <i>Botrytis cinerea</i> by <i>Bacillus cereus</i> . Key regulator of SA-mediated signaling.                                                     | (1, 2)    |
| 2.      | <i>At3g56400</i> | <i>AtWRKY70</i>          | Function as activator of SA-dependent defense genes and a repressor of JA-regulated genes. <i>WRKY70</i> controlled suppression of JA-signaling is partly executed by <i>NPR1</i> . | (3)       |
| 3.      | <i>Atlg05675</i> | <i>AtUGT</i> superfamily | Mediates abscisic acid homeostasis in                                                                                                                                               | (4)       |

|    |                  |               | Arabidopsis                                                                                                          |        |
|----|------------------|---------------|----------------------------------------------------------------------------------------------------------------------|--------|
| 4. | <i>At5g42650</i> | <i>AtAOS2</i> | JA biosynthetic pathway. Defense response                                                                            | (4, 5) |
| 5. | <i>At3g22400</i> | <i>AtLOX5</i> | Activate Brassinosteroid signaling to promote cell wall based defense and limit pathogen infection                   | (6)    |
| 6. | <i>At5g44210</i> | <i>AtERF9</i> | Participates in resistance against necrotrophic fungi.                                                               | (7)    |
| 7. | <i>At3g20770</i> | <i>AtEIN3</i> | Modulate plant salt tolerance. EIN3 interferes with the sulfur deficiency signaling in <i>Arabidopsis thaliana</i> . | (8, 9) |

1079

1080 **Table S3.** As XLS sheet (attached separately)

1081

1082 **Table S4.** List of 16 key defense genes.

| Sl. no. | TAIR Id.         | Gene name                      | Function of gene                                              | Expression pattern as per Gene investigator analysis* | References |
|---------|------------------|--------------------------------|---------------------------------------------------------------|-------------------------------------------------------|------------|
| 1       | <i>At5g42190</i> | <i>SKP-LIKE 2, ASK2, SKP1B</i> | Involved in mitotic cell cycle control and ubiquitin mediated | Highly expressed                                      | (10)       |

|   |                  |                                                                                                                               |                                                                                                                                               |                  |             |
|---|------------------|-------------------------------------------------------------------------------------------------------------------------------|-----------------------------------------------------------------------------------------------------------------------------------------------|------------------|-------------|
|   |                  |                                                                                                                               | proteolysis.                                                                                                                                  |                  |             |
| 2 | <i>At5g52640</i> | <i>ATHSP9</i><br><i>0.1</i>                                                                                                   | Interacts with disease resistance signalling components SGT1b and RAR1 and is required for RPS2-mediated resistance.                          | Highly expressed | (11)        |
| 3 | <i>At1g75950</i> | <i>S</i><br><i>PHASE</i><br><i>KINASE</i><br>-<br><i>ASSOCI</i><br><i>ATED</i><br><i>PROTEI</i><br><i>N 1,</i><br><i>SKP1</i> | Component of the SCF family of E3 ubiquitin ligases. Predominately expressed from leptotene to pachytene. Negatively regulates recombination. | Highly expressed | (12,<br>13) |

|   |                  |                                                               |                                                                                                   |                  |          |
|---|------------------|---------------------------------------------------------------|---------------------------------------------------------------------------------------------------|------------------|----------|
| 4 | <i>At4g01370</i> | <i>ATMPK4, MAPKINASE4</i>                                     | Negatively regulates systemic acquired resistance. Required for male-specific meiotic cytokinesis | Highly expressed | (14, 15) |
| 5 | <i>At3g62870</i> | <i>Ribosomal protein L7Ae/L30e/S12e/Gadd45 family protein</i> | Structural constituent of ribosome, involved in translation, located in cytosolic ribosome.       | Highly expressed | (16)     |
| 6 | <i>At2g43790</i> | <i>ATMAPK6, ATMPK6</i>                                        | Involved in seed formation and modulation of primary and lateral root development. Differentially | Highly expressed | (17, 18) |



|   |                  |                                           |                                                                                                                                                         |                            |          |
|---|------------------|-------------------------------------------|---------------------------------------------------------------------------------------------------------------------------------------------------------|----------------------------|----------|
|   |                  |                                           | regulates growth and pathogen defense in <i>Arabidopsis thaliana</i> .                                                                                  |                            |          |
| 7 | <i>At4g08500</i> | <i>MAPK/ERK KINASE KINASE 1, ATM EKK1</i> | Activate in response to flagellin receptor FLS2 WRKY53 transcription factor. Mediates function during cold acclimation in <i>Arabidopsis thaliana</i> . | Moderate expression        | (19, 20) |
| 8 | <i>At2g01950</i> | <i>BRI1-LIKE 2, BRL2,</i>                 | Auxin-activated signalling pathway, Brassinosteroid mediated signalling pathway. Regulates                                                              | Low to moderate expression | (21, 22) |

|    |                  |                                           |                                                                                                                             |                            |          |
|----|------------------|-------------------------------------------|-----------------------------------------------------------------------------------------------------------------------------|----------------------------|----------|
|    |                  |                                           | the containmen<br>t of microbial infection-induced cell death.                                                              |                            |          |
| 9  | <i>At5g10260</i> | <i>ATRAB HIE, RAB GTPAS E HOMOLOG HIE</i> | Involved in: protein transport, small GTPase mediated signal transduction. Vesicle Trafficking in Arabidopsis pollen tubes. | Low to moderate expression | (23, 24) |
| 10 | <i>At4g38740</i> | <i>ROCI, ROTAM ASE CYP 1</i>              | Blue light signalling pathway, Brassinosteroid mediated signalling pathway.                                                 | Highly expressed           | (25)     |
| 11 | <i>At5g56030</i> | <i>ATHSP9 0.2,</i>                        | Important for                                                                                                               | Highly expressed           | (26, 27) |

|    |                  |                                                          |                                                                                                                               |                  |           |
|----|------------------|----------------------------------------------------------|-------------------------------------------------------------------------------------------------------------------------------|------------------|-----------|
|    |                  | <i>EARLY-RESPO<br/>NSIVE<br/>TO<br/>DEHYD<br/>RATION</i> | stomatal closure and modulate abscisic acid-dependent physiological responses. Required for NLR immune receptor accumulation. |                  |           |
| 12 | <i>At3g02520</i> | <i>GENERAL<br/>REGULATORY<br/>FACTOR<br/>7.GRF7</i>      | Contribute to polarity of PIN auxin carrier and auxin transport-related development. Important for plant development.         | Highly expressed | (28, 29). |

|    |                  |                                                                                                                                                            |                                                                                                                                   |                  |          |
|----|------------------|------------------------------------------------------------------------------------------------------------------------------------------------------------|-----------------------------------------------------------------------------------------------------------------------------------|------------------|----------|
| 13 | <i>At1g78300</i> | <i>GENER</i><br><i>AL</i><br><i>REGUL</i><br><i>ATORY</i><br><i>FACTO</i><br><i>R 2,</i><br><i>GF14</i><br><i>OMEGA</i><br><i>, GRF2,</i><br><i>14-3-3</i> | Brassinosteroid mediated signalling pathway. Contribute to polarity of PIN auxin carrier and auxin transport-related development. | Highly expressed | (28, 30) |
| 14 | <i>At3g43810</i> | <i>ATCAM</i><br><i>7,</i><br><i>CALMO</i><br><i>DULIN</i><br><i>7</i>                                                                                      | Inhibition of the Arabidopsis BRASSINOSTEROID-INSENSITIVE 1 receptor kinase. Promote photomorphogenesis. Regulate root growth     | Highly expressed | (31, 32) |

|    |                  |                                                        |                                                                                             |                     |          |
|----|------------------|--------------------------------------------------------|---------------------------------------------------------------------------------------------|---------------------|----------|
|    |                  |                                                        | and<br>abscisic<br>acid<br>responses.                                                       |                     |          |
| 15 | <i>At5g23430</i> | <i>Transducin/WD40 repeat-like superfamily protein</i> | Controls seed germination, growth and biomass accumulation in <i>Arabidopsis thaliana</i> . | Moderate expression | (33)     |
| 16 | <i>At3g12580</i> | <i>ARABIDOPSIS HEAT SHOCK PROTEIN 70, ATHSP70</i>      | Regulate development and abiotic stress. Required for protection against oxidative stress.  | Moderate expression | (34, 35) |

1083 \*: The expression during various biotic stress were consider during the  
 1084 analysis

1085  
 1086  
 1087  
 1088

1089 **Table S5.** List of primer used in this study.

| <b>Primer name.</b>                                                                                              | <b>GeneID.</b> | <b>Primer sequence (5' to 3')</b>             |
|------------------------------------------------------------------------------------------------------------------|----------------|-----------------------------------------------|
| <b>For full length gene amplification and cloning (Highlighted region in primer represent restriction sites)</b> |                |                                               |
| <i>At1G132</i><br>60.1                                                                                           | RAV10X<br>-F   | 5' <u>ATCGAT</u> ATGGAATCGAGTAGCGTTGATGAGA3'  |
|                                                                                                                  | RAV10X<br>-R   | 5' <u>TCTAGAT</u> TACGAGGCGTGAAAGATGCGTTGCT3' |
| EU1644<br>16                                                                                                     | SIRAV10<br>X-F | 5' <u>GGATCC</u> ATGGAGGTAAGTTGCATAG 3'       |
|                                                                                                                  | SIRAV10<br>X-R | 5' <u>CTCGAGT</u> CAAGGCATCAATTATTACCCT 3'    |
| <b>For Expression study by Real time q-RT PCR</b>                                                                |                |                                               |
| <i>At5g421</i><br>90.1                                                                                           | AtASK2<br>RTF  | 5'CGAAATTGACGAAGCGGTGG3'                      |
|                                                                                                                  | AtASK2<br>RTR  | 5'GCAGCTTCGACATGTCTCTT3'                      |
| <i>At5g526</i><br>40.1                                                                                           | AtHSP90<br>RTF | 5'ACGGTACCACTCCACAAAGAG3'                     |
|                                                                                                                  | AtHSP90<br>RTR | 5'ACCGCCTTTTTGCTTTCACC3'                      |
| <i>At1g759</i><br>50.1                                                                                           | AtSKP1<br>RTF  | 5'GGGACTGTTGGACTTGACTT3'                      |
|                                                                                                                  | AtSKP1<br>RTR  | 5'CGGCGAACCTCTTCTTCTT3'                       |
| <i>At4g013</i><br>70.1                                                                                           | AtMPK4<br>RTF  | 5'CATGGTGGTAGCTATGTTTCAGT3'                   |
|                                                                                                                  | AtMPK4<br>RTR  | 5'GCAGCACAGACAATTCCATAAG3'                    |
| <i>At3g628</i><br>70.1                                                                                           | AtL7Ae<br>RTF  | 5'TTGAGAGACGCCCAAAGCAA 3'                     |



|                        |                 |                             |
|------------------------|-----------------|-----------------------------|
|                        | AtL7Ae<br>RTR   | 5'AGGATACGCTTCTGCCTTTGA3'   |
| <i>At2g437</i><br>90.1 | AtMPK6<br>RTF   | 5'TGAACGAAAACGCAAAGCGA3'    |
|                        | AtMPK6<br>RTR   | 5'CAGTGATGGATTGGCGAGGA3'    |
| <i>At4g085</i><br>00.1 | AtMEKK<br>1 RTF | 5'TAAGGTTTCAGGGTCAGGATTTG3' |
|                        | AtMEKK<br>1RTR  | 5'TCTACCACACCATCAGCTACTA3'  |
| <i>At2g019</i><br>50.1 | AtBRI1<br>RTF   | 5'AAACCTCGTACCGCTCTTGG3'    |
|                        | AtBRI1<br>RTR   | 5'ATCCTCCGTTTTTCGCCTGT3'    |
| <i>At5g102</i><br>60.1 | AtRABH1<br>RTF  | 5'ACCAGCATCATCACTCGTTT3'    |
|                        | AtRABH1<br>RTR  | 5'GTTGGAGACGAACAGTCCTATC3'  |
| <i>At4g387</i><br>40.1 | AtROC1<br>RTF   | 5'TTTCACCGTGTGATCCCTAAC3'   |
|                        | AtROC1<br>RTR   | 5'GGTGTGCTTCTCTCGAAAT3'     |
| <i>At5g560</i><br>30.1 | AtHSP90<br>RTF  | 5'CTGCTAGGATTCACAGGATGTT3'  |
|                        | AtHSP90<br>RTR  | 5'CTTCCTCCATCTTGCTCTCTTC3'  |
| <i>At3g025</i><br>20.1 | AtGRF7<br>RTF   | 5'CTGCTGAGAGCACTCTGGTT3'    |
|                        | AtGRF7<br>RTR   | 5'CAGGCACGATCAGGTGAGTT3'    |
| <i>At1g783</i><br>00.1 | At14-3-3<br>RTF | 5'AGAGCTTGCTCCAACACACC3'    |

|                        |                  |                             |
|------------------------|------------------|-----------------------------|
|                        | At14-3-3<br>RTR  | 5'AGGTTACAGGCACGATCAGG3'    |
| <i>At3g438</i><br>10.1 | AtCAM7<br>RTF    | 5'AGGAGCTTGGGACTGTGATG3'    |
|                        | AtCAM7<br>RTR    | 5'CTATTGTCCCGTTCCCGTCT 3'   |
| <i>At5g234</i><br>30.1 | AtWD40<br>RTF    | 5'CCAGAGCAGACCCTAGAATAGA3'  |
|                        | AtWD40<br>RTR    | 5'TAGGTGACCTTCGGGAATCA3'    |
| <i>At3g125</i><br>80.1 | AtHSP70<br>RTF   | 5'GGCAGATGAGTTCGAGGATAAG3'  |
|                        | AtHSP70<br>RTR   | 5'AGGTGTGTCGTCATCCATTC3'    |
| <i>At3G187</i><br>80.1 | AtACT<br>RTF     | 5' GACCTTTAACTCTCCCGCTATG3' |
|                        | AtACT<br>RTR     | 5'GAGACACACCATCACCAGAAT3'   |
| <i>At1g642</i><br>80.1 | AtNPR1<br>RTF    | 5'CGGTTTCGATTCGGTTGTG3'     |
|                        | AtNPR1<br>RTR    | 5'TCGTCTGCGCATT CAGAAACT3'  |
| <i>At3g564</i><br>00.1 | AtWRKY<br>70 RTF | CAAGGGTGCAAGGCAACAA3'       |
|                        | AtWRKY<br>70 RTR | 5'TTGGGAGTTTCTGCGTTGGT3'    |
| <i>At1g056</i><br>75.1 | AtUGT<br>RTF     | 5'GCCGTGGCTTCTGGATGTAG3'    |
|                        | AtUGT<br>RTR     | 5'AGAACGAGCCCTTGAATACATGA3' |
| <i>At5g426</i><br>50.1 | AtAOS2<br>RTF    | 5'CGGGCGGGTCATCAAGT3'       |

|                                                                                                            |                |                                        |
|------------------------------------------------------------------------------------------------------------|----------------|----------------------------------------|
|                                                                                                            | AtAOS2<br>RTR  | 5'AATCGCTCCCATCGTGAGTT3'               |
| <i>At3g224</i><br><i>00.1</i>                                                                              | AtLOX5<br>RTF  | 5'TGCGGTCAATGACTCTGGTTAT3'             |
|                                                                                                            | AtLOX5<br>RTR  | 5'ACCACGCTGAGCTGCCTATT3'               |
| <i>At5g442</i><br><i>10.1</i>                                                                              | AtERF<br>RTF   | 5'GGTTATGCTTCTGCTGGTTTTTTC3'           |
|                                                                                                            | AtERF<br>RTR   | 5'ATCAAACCGAACCGACAAA3'                |
| <i>At3g207</i><br><i>70.1</i>                                                                              | AtEIN3<br>RTF  | 5'GTTCCACAAGCTGAGCCTGAT3'              |
|                                                                                                            | AtEIN3<br>RTR  | 5'TCTCCACATCCTCCTCTCCAA3'              |
| <i>At1G132</i><br><i>60.1</i>                                                                              | AtRAV1<br>RTF  | 5'TACCGAAACATCACGCAGAG3'               |
|                                                                                                            | AtRAV1<br>RTR  | 5'TAACGGAACCTCCACACTTTC3'              |
| X04879.<br>1                                                                                               | CaMV<br>35S F  | 5'GCGATAAAGGAAAGGCTATCG3'              |
| <i>U55761</i><br><i>1</i>                                                                                  | NptII F        | 5'TGATTGAACAAGATGGATTGC3'              |
|                                                                                                            | NptII R        | 5'GAACTCGTCAAGAAGGCGATA3'              |
| U60480.<br>1                                                                                               | SlActin_F      | TGGCATCATACTTTCTACAATG                 |
|                                                                                                            | SlActin_R      | CTAATATCCACGTCACATTTTCAT               |
| <b>Primer used for GUS based Reporter assay (Highlighted region in primer represent restriction sites)</b> |                |                                        |
| <i>At1g759</i><br><i>50.1</i>                                                                              | SKP1_GU<br>S_F | <u>AAGCTT</u> CTGATAAAGACTCAGTATCTTTAA |
|                                                                                                            | SKP1_GU<br>S_R | <u>GGATCC</u> AGTCTTAACCTAATTAGGT      |
| <i>At4g013</i><br><i>70.1</i>                                                                              | MPK4_G<br>US_F | <u>GTCGAC</u> ATTATCGCCAAAGCTTCTCTC    |

|                                                                                             |                 |                                       |
|---------------------------------------------------------------------------------------------|-----------------|---------------------------------------|
|                                                                                             | MPK4_G<br>US_R  | <u>GGATCCT</u> CATGGTTAAACAACCTTATA   |
| <i>At2g019</i><br>50.1                                                                      | BRL2_G<br>US_F  | <u>AAGCTT</u> ATCTTTGTGGTATACTGTATTTA |
|                                                                                             | BRL2_G<br>US_R  | <u>GGATCC</u> AGTGTAGTATTATATAAACT    |
| <i>At4g387</i><br>40.1                                                                      | ROC1_G<br>US_F  | <u>AAGCTT</u> CAGATTTCTTCTACAGA       |
|                                                                                             | ROC1_G<br>US_R  | <u>GGATCCT</u> TATAAATAAACAAGGATTA    |
| <i>At5g234</i><br>30.1                                                                      | WD40_G<br>US_F  | <u>GTCGAC</u> ATTCCTATTCTCATAAACT     |
|                                                                                             | WD40_G<br>US_R  | <u>GGATCCT</u> TATATAATGGAATTATGAAAC  |
| <i>At3g125</i><br>80.1                                                                      | HSP70_G<br>US_F | <u>GTCGAC</u> AAGAAATATGGGTGAGACT     |
|                                                                                             | HSP70_G<br>US_R | <u>GGATCC</u> ATTCGGTGTTTAGGCAC       |
| <b>Primer used for Y1H assay (Highlighted region in primer represent restriction sites)</b> |                 |                                       |
| <i>At1g759</i><br>50.1                                                                      | SKP1_BA<br>IT_F | <u>GAGCTC</u> CTGATAAGACTCAGTATCTTTAA |
|                                                                                             | SKP1_BA<br>IT_R | <u>CTCGAG</u> AGTCTTAACCTAATTAGGT     |
| <i>At4g013</i><br>70.1                                                                      | MPK4_B<br>AIT_F | <u>GAGCTC</u> ATTATCGCCAAAGCTT        |
|                                                                                             | MPK4_B<br>AIT_R | <u>GTCGACT</u> CATGGTTAAACAACCTTATA   |
| <i>At2g019</i><br>50.1                                                                      | BRL2_BA<br>IT_F | <u>GAGCTC</u> ATCTTTGTGGTATACTGTATTTA |
|                                                                                             | BRL2_BA<br>IT_R | <u>GTCGAC</u> AGTGTAGTATTATATAAACT    |

|                                                            |            |                                     |
|------------------------------------------------------------|------------|-------------------------------------|
| <i>At4g387</i><br>40.1                                     | ROC1_B     | <u>GAGCTC</u> CAGATTTCTTCTACAGA     |
|                                                            | AIT_F      |                                     |
|                                                            | ROC1_B     | <u>GTCGACT</u> TATAAATAAACAAGGATTA  |
|                                                            | AIT_R      |                                     |
| <i>At5g234</i><br>30.1                                     | WD40_B     | <u>GAGCTC</u> ATTCCTATTCTCATAAACT   |
|                                                            | AIT_F      |                                     |
|                                                            | WD40_B     | <u>GTCGACT</u> TATATAATGGAATTATGA   |
|                                                            | AIT_R      |                                     |
| <i>At3g125</i><br>80.1                                     | HSP70_B    | <u>CCCGGG</u> AAGAAATATGGGTGAGACT   |
|                                                            | AIT_F      |                                     |
|                                                            | HSP70_B    | <u>GTCGAC</u> ATTCGGTGTTTAGGCAC     |
|                                                            | AIT_R      |                                     |
| <i>At1G132</i><br>60.1                                     | ATRAV_     | <u>TCCCCC</u> CGGGTATGGAATCGAGTAGCG |
|                                                            | PREY_F     |                                     |
|                                                            | ATRAV_     | <u>CCGCTC</u> GAGCCGAGGCGTGAAAGATGC |
|                                                            | PREY_R     |                                     |
| <b>Primer used for <i>atrav1</i> mutant validation</b>     |            |                                     |
| <i>At1G132</i><br>60.1                                     | RAV1_R     | GTGAAGATGGACGAAGACGAG               |
|                                                            | (RP)       |                                     |
|                                                            | TDNA_B     | ATTTTGCCGATTTTCGGAAC                |
|                                                            | order (BP) |                                     |
| <b>Primer used for <i>MAP kinase</i> mutant validation</b> |            |                                     |
| AT3G45<br>640<br>(SALK_<br>100651)<br>mpk3                 | TDNA_B     | ATTTTGCCGATTTTCGGAAC                |
|                                                            | order (BP) |                                     |
|                                                            | mpk3_RP    | TTGGTGTTTTTGTGTCATGG                |
|                                                            |            |                                     |
| AT4G01<br>370<br>(SALK_<br>056245)<br>mpk4-2               | TDNA_B     | ATTTTGCCGATTTTCGGAAC                |
|                                                            | order (BP) |                                     |
|                                                            | mpk4_RP    | GTCTTAGAGATCAGCGGGGAC               |
|                                                            |            |                                     |

|                                                    |                      |                                |
|----------------------------------------------------|----------------------|--------------------------------|
| AT2G43<br>790<br>(SALK_<br>073907)<br>mpk6-2       | TDNA_B<br>order (BP) | ATTTTGCCGATTCGGAAC             |
|                                                    | mpk6_RP              | ATCTATGTTGGCGTTTGCAAC          |
| <b>Primer used for ATRAV1 protein purification</b> |                      |                                |
| <i>At1G132</i><br><i>60.1</i>                      | RAV1_PE<br>T_F       | CATATGATGGAATCGAGTAGCGTTGATG   |
|                                                    | RAV1_PE<br>T_R       | CTCGAGCGAGGCGTGAAAGATGCGTTGCTT |

1090

1091 **References**

- 1092 1. P. Nie, *et al.*, Induced Systemic Resistance against Botrytis cinerea by  
1093 Bacillus cereus AR156 through a JA/ET- and NPR1-Dependent Signaling  
1094 Pathway and Activates PAMP-Triggered Immunity in Arabidopsis. *Front.*  
1095 *Plant Sci.* **8**, 1–12 (2017).
- 1096 2. W. Fan, X. Dong, In Vivo Interaction between NPR1 and Transcription  
1097 Factor TGA2 Leads to Salicylic Acid-Mediated Gene Activation in  
1098 Arabidopsis. *Plant Cell* **14**, 1377–1389 (2002).
- 1099 3. J. Li, G. Brader, T. Kariola, E. Tapio Palva, WRKY70 modulates the  
1100 selection of signaling pathways in plant defense. *Plant J.* **46**, 477–491  
1101 (2006).
- 1102 4. Z. Liu, *et al.*, UDP-glucosyltransferase71C5, a major glucosyltransferase,  
1103 mediates abscisic acid homeostasis in Arabidopsis. *Plant Physiol.* **167**, 1659–  
1104 70 (2015).
- 1105 5. K. M. Pajerowska, J. E. Parker, C. Gebhardt, Potato homologs of  
1106 Arabidopsis thaliana genes functional in defense signaling - Identification,  
1107 genetic mapping, and molecular cloning. *Mol. Plant-Microbe Interact.* **18**,  
1108 1107–1119 (2005).
- 1109 6. R. Marcos, *et al.*, 9-Lipoxygenase-derived oxylipins activate brassinosteroid

- 1110 signaling to promote cell wall-based defense and limit pathogen infection.  
1111 *Plant Physiol.* **4**, pp.00992.2015 (2015).
- 1112 7. Y. Maruyama, *et al.*, The Arabidopsis transcriptional repressor ERF9  
1113 participates in resistance against necrotrophic fungi. *Plant Sci.* **213**, 79–87  
1114 (2013).
- 1115 8. R. Quan, *et al.*, EIN3 and SOS2 synergistically modulate plant salt tolerance.  
1116 *Sci Rep* **7**, 44637 (2017).
- 1117 9. A. Wawrzyńska, A. Sirko, EIN3 interferes with the sulfur deficiency  
1118 signaling in Arabidopsis thaliana through direct interaction with the SLIM1  
1119 transcription factor. *Plant Sci.* **253**, 50–57 (2016).
- 1120 10. F. Liu, *et al.*, The ASK1 and ASK2 genes are essential for Arabidopsis early  
1121 development. *Plant Cell* **16**, 5–20 (2004).
- 1122 11. A. Takahashi, C. Casais, K. Ichimura, K. Shirasu, HSP90 interacts with  
1123 RAR1 and SGT1 and is essential for RPS2-mediated disease resistance in  
1124 Arabidopsis. *Proc. Natl. Acad. Sci. U. S. A.* **100**, 11777–11782 (2003).
- 1125 12. E. Mazzucotelli, *et al.*, The e3 ubiquitin ligase gene family in plants:  
1126 regulation by degradation. *Curr. Genomics* **7**, 509–22 (2006).
- 1127 13. Y. Wang, M. Yang, The ARABIDOPSIS SKP1-LIKE1 (ASK1) protein acts  
1128 predominately from leptotene to pachytene and represses homologous  
1129 recombination in male meiosis. *Planta* **223**, 613–617 (2006).
- 1130 14. M. Petersen, *et al.*, Arabidopsis map kinase 4 negatively regulates systemic  
1131 acquired resistance. *Cell* **103**, 1111–1120 (2000).
- 1132 15. Q. Zeng, J. G. Chen, B. E. Ellis, AtMPK4 is required for male-specific  
1133 meiotic cytokinesis in Arabidopsis. *Plant J.* **67**, 895–906 (2011).
- 1134 16. A. J. Carroll, J. L. Heazlewood, J. Ito, A. H. Millar, Analysis of the  
1135 Arabidopsis cytosolic ribosome proteome provides detailed insights into its  
1136 components and their post-translational modification. *Mol. Cell. Proteomics*  
1137 **7**, 347–369 (2008).



- 1138 17. J. S. López-Bucio, *et al.*, Arabidopsis thaliana mitogen-activated protein  
1139 kinase 6 is involved in seed formation and modulation of primary and lateral  
1140 root development. *J. Exp. Bot.* **65**, 169–183 (2014).
- 1141 18. M. A. T. Palm-Forster, L. Eschen-Lippold, J. Uhrig, D. Scheel, J. Lee, A  
1142 novel family of proline/serine-rich proteins, which are phospho-targets of  
1143 stress-related mitogen-activated protein kinases, differentially regulates  
1144 growth and pathogen defense in Arabidopsis thaliana. *Plant Mol. Biol.*  
1145 (2017) <https://doi.org/10.1007/s11103-017-0641-5>.
- 1146 19. T. Asai, *et al.*, Map kinase signalling cascade in Arabidopsis innate  
1147 immunity. *Nature* **415**, 977–983 (2002).
- 1148 20. T. Furuya, D. Matsuoka, T. Nanmori, Membrane rigidification functions  
1149 upstream of the MEKK1-MKK2-MPK4 cascade during cold acclimation in  
1150 Arabidopsis thaliana. *FEBS Lett.* **588**, 2025–2030 (2014).
- 1151 21. J. L. Nemhauser, T. C. Mockler, J. Chory, Interdependency of  
1152 brassinosteroid and auxin signaling in Arabidopsis. *PLoS Biol.* **2** (2004).
- 1153 22. B. Kemmerling, *et al.*, The BRI1-Associated Kinase 1, BAK1, Has a  
1154 Brassinolide-Independent Role in Plant Cell-Death Control. *Curr. Biol.* **17**,  
1155 1116–1122 (2007).
- 1156 23. V. Vernoud, A. C. Horton, Z. Yang, E. Nielsen, Analysis of the small  
1157 GTPase gene superfamily of Arabidopsis. *Plant Physiol.* **131**, 1191–208  
1158 (2003).
- 1159 24. N. Kato, H. He, A. P. Steger, A systems model of vesicle trafficking in  
1160 Arabidopsis pollen tubes. *Plant Physiol.* **152**, 590–601 (2010).
- 1161 25. S. A. Trupkin, S. Mora-García, J. J. Casal, The cyclophilin ROC1 links  
1162 phytochrome and cryptochrome to brassinosteroid sensitivity. *Plant J.* **71**,  
1163 712–723 (2012).
- 1164 26. M. Clement, *et al.*, The cytosolic/nuclear HSC70 and HSP90 molecular  
1165 chaperones are important for stomatal closure and modulate abscisic acid-  
1166 dependent physiological responses in Arabidopsis. *Plant Physiol.* **156**, 1481–

- 1167 1492 (2011).
- 1168 27. S. Huang, *et al.*, HSP90s are required for NLR immune receptor  
1169 accumulation in Arabidopsis. *Plant J.* **79**, 427–439 (2014).
- 1170 28. J. Keicher, *et al.*, Arabidopsis 14-3-3 epsilon members contribute to polarity  
1171 of PIN auxin carrier and auxin transport-related development. *Elife* **6** (2017).
- 1172 29. H. Fulgosi, *et al.*, 14-3-3 proteins and plant development. *Plant Mol. Biol.*  
1173 **50**, 1019–1029 (2002).
- 1174 30. S. S. Gampala, *et al.*, An essential role for 14-3-3 proteins in brassinosteroid  
1175 signal transduction in Arabidopsis. *Dev. Cell* **13**, 177–189 (2007).
- 1176 31. M.-H. Oh, *et al.*, Calcium/calmodulin inhibition of the Arabidopsis  
1177 BRASSINOSTEROID-INSENSITIVE 1 receptor kinase provides a possible  
1178 link between calcium and brassinosteroid signalling. *Biochem. J.* **443**, 515–  
1179 523 (2012).
- 1180 32. N. Abbas, J. P. Maurya, D. Senapati, S. N. Gangappa, S. Chattopadhyay,  
1181 Arabidopsis CAM7 and HY5 physically interact and directly bind to the HY5  
1182 promoter to regulate its expression and thereby promote  
1183 photomorphogenesis. *Plant Cell* **26**, 1036–1052 (2014).
- 1184 33. E. W. Gachomo, J. C. Jimenez-Lopez, L. J. Baptiste, S. O. Kotchoni,  
1185 GIGANTUS1 (GTS1), a member of Transducin/WD40 protein superfamily,  
1186 controls seed germination, growth and biomass accumulation through  
1187 ribosome-biogenesis protein interactions in Arabidopsis thaliana. *BMC Plant*  
1188 *Biol.* **14**, 1–17 (2014).
- 1189 34. L. Leng, *et al.*, A subclass of HSP70s regulate development and abiotic stress  
1190 responses in Arabidopsis thaliana. *J. Plant Res.* **130**, 349–363 (2017).
- 1191 35. P. Pulido, E. Llamas, M. Rodriguez-Concepcion, Both Hsp70 chaperone and  
1192 Clp protease plastidial systems are required for protection against oxidative  
1193 stress. *Plant Signal. Behav.* **12**, e1290039 (2017).
- 1194
